# Supplementary material for: One-carbon homologation of arylboronic acids: a convenient approach to the synthesis of pinacol benzylboronates
Source: Royal Society of Chemistry journal article supplement (doi:10.1039/c6qo00141f), 2016-01-01

## *Supporting Information*

### **One-Carbon Homologation of Arylboronic Acids: A Convenient Approach to the Synthesis of Pinacol Benzylboronates**

Chaoqiang Wu, Guojiao Wu, Yan Zhang and Jianbo Wang\*

*Beijing National Laboratory of Molecular Sciences (BNLMS), Key Laboratory of  
Bioorganic Chemistry and Molecular Engineering of Ministry of Education, College  
of Chemistry, Peking University, Beijing 100871, China*

### **$^1\text{H}$ and $^{13}\text{C}$ NMR spectra**

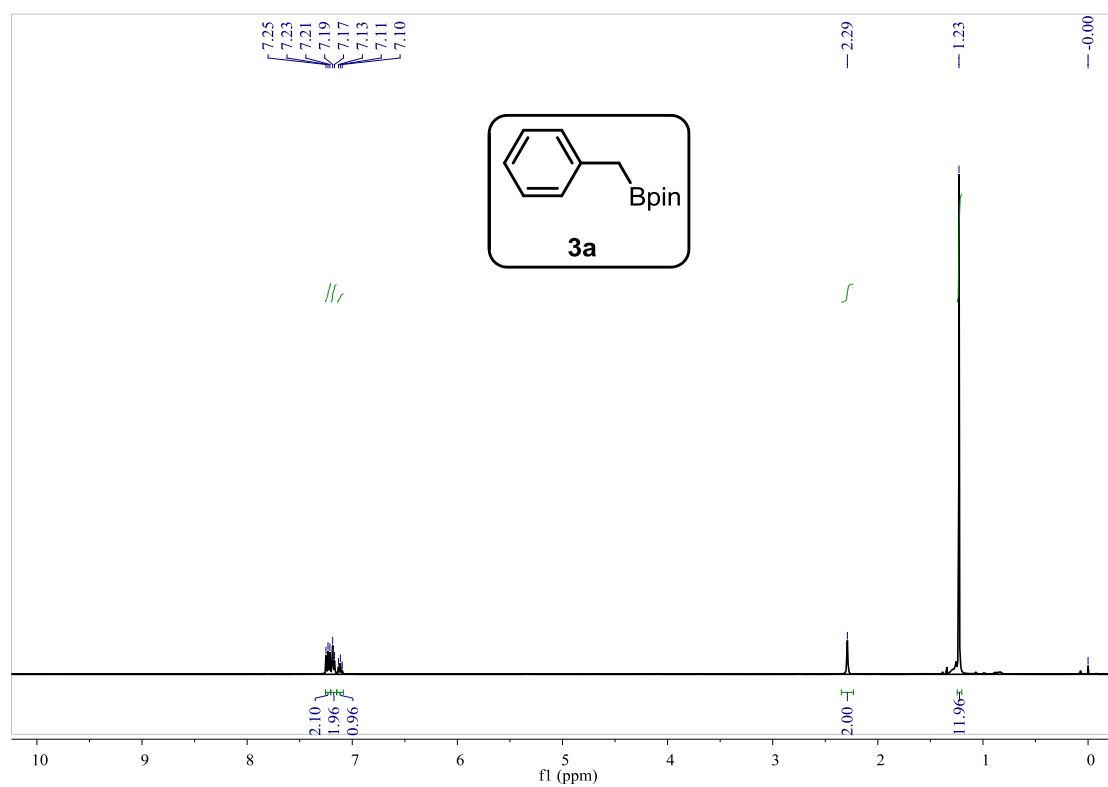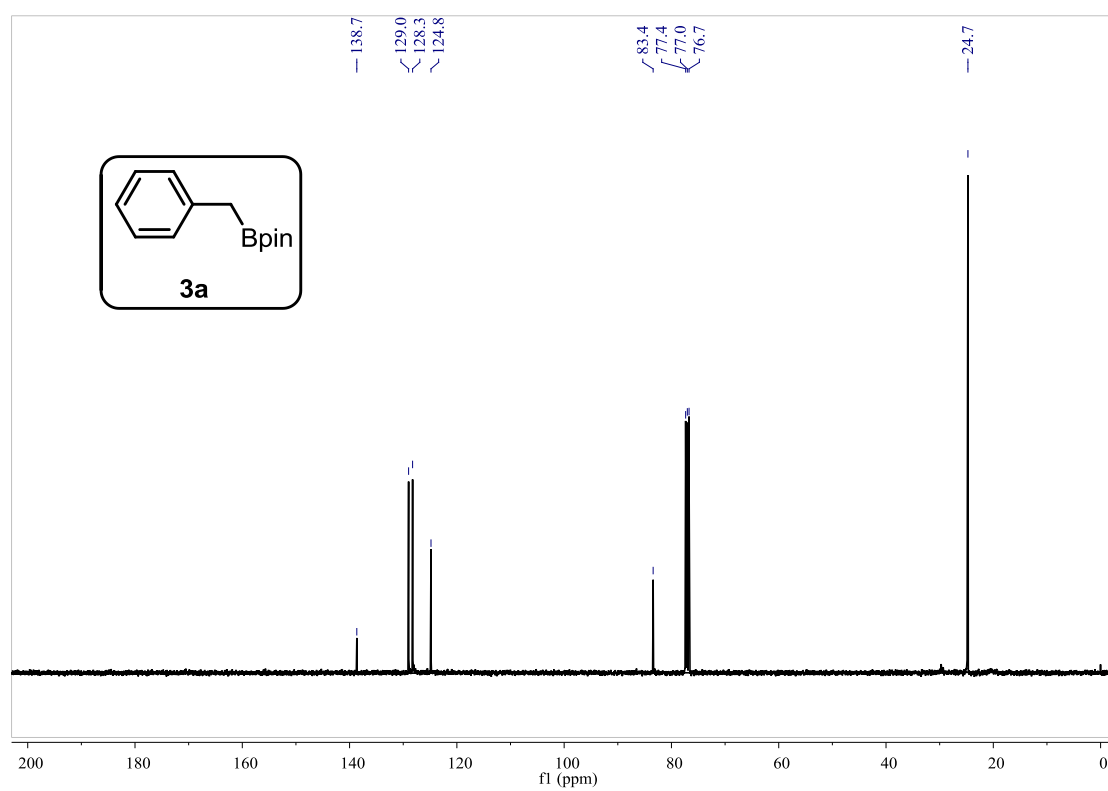

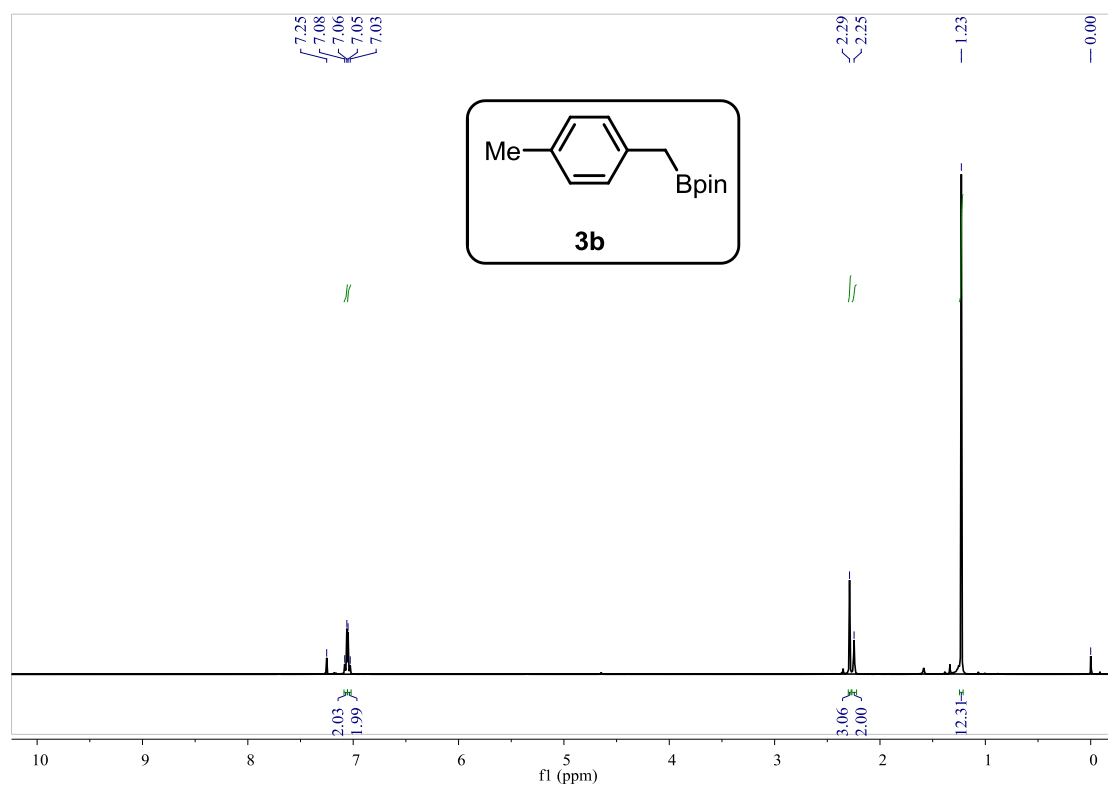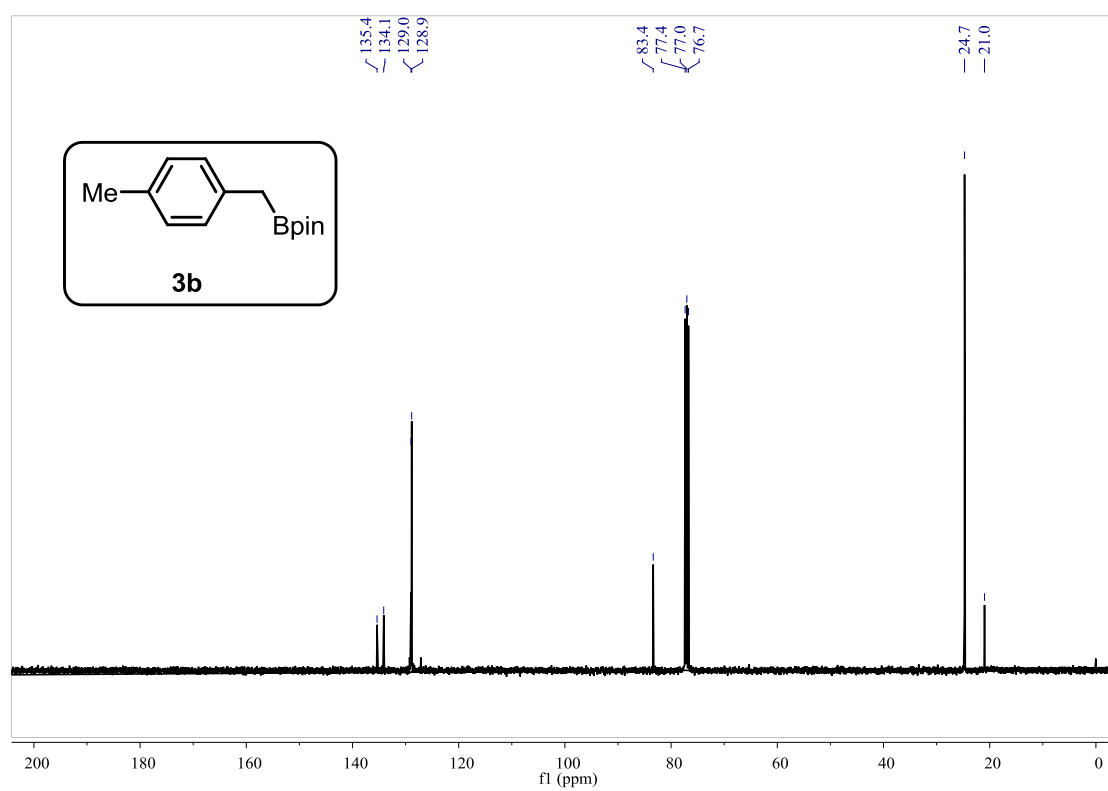

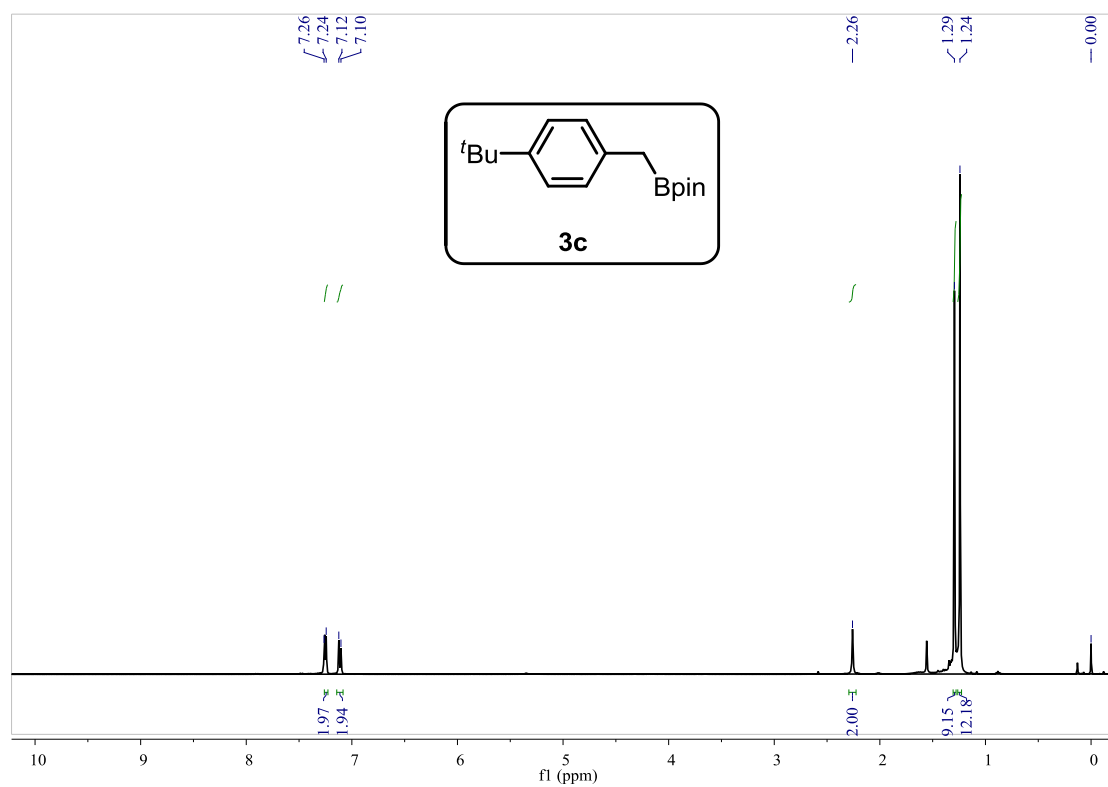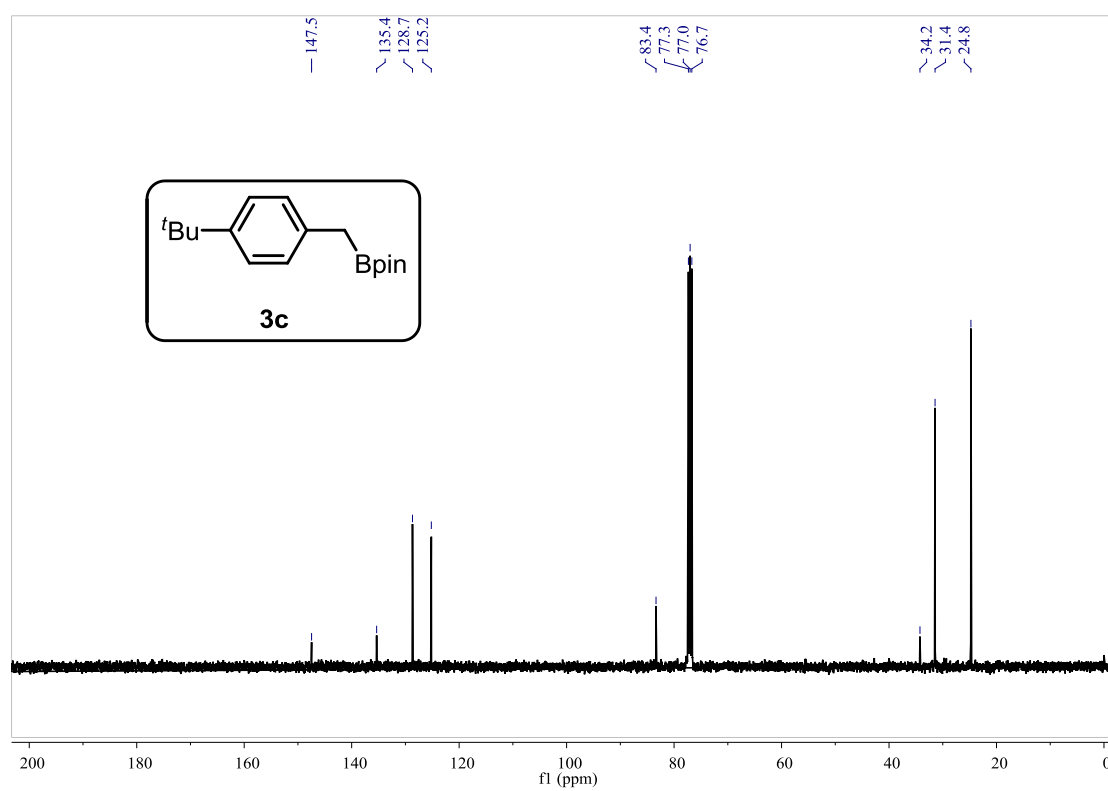

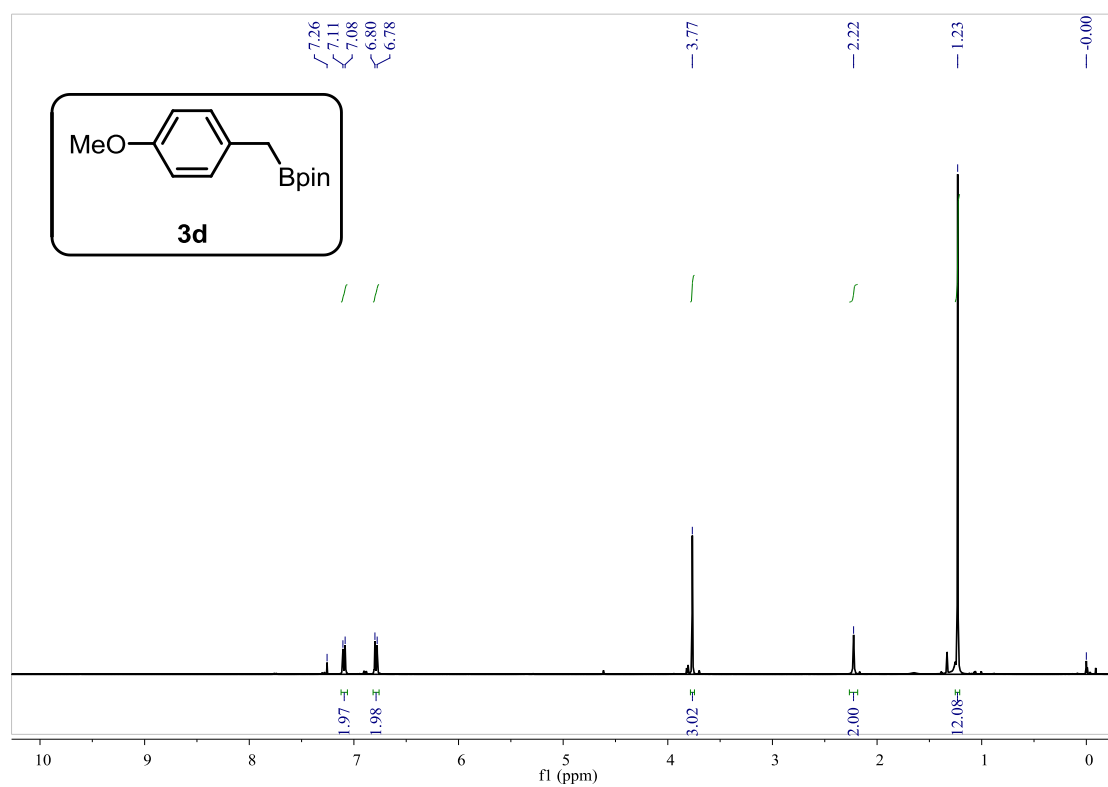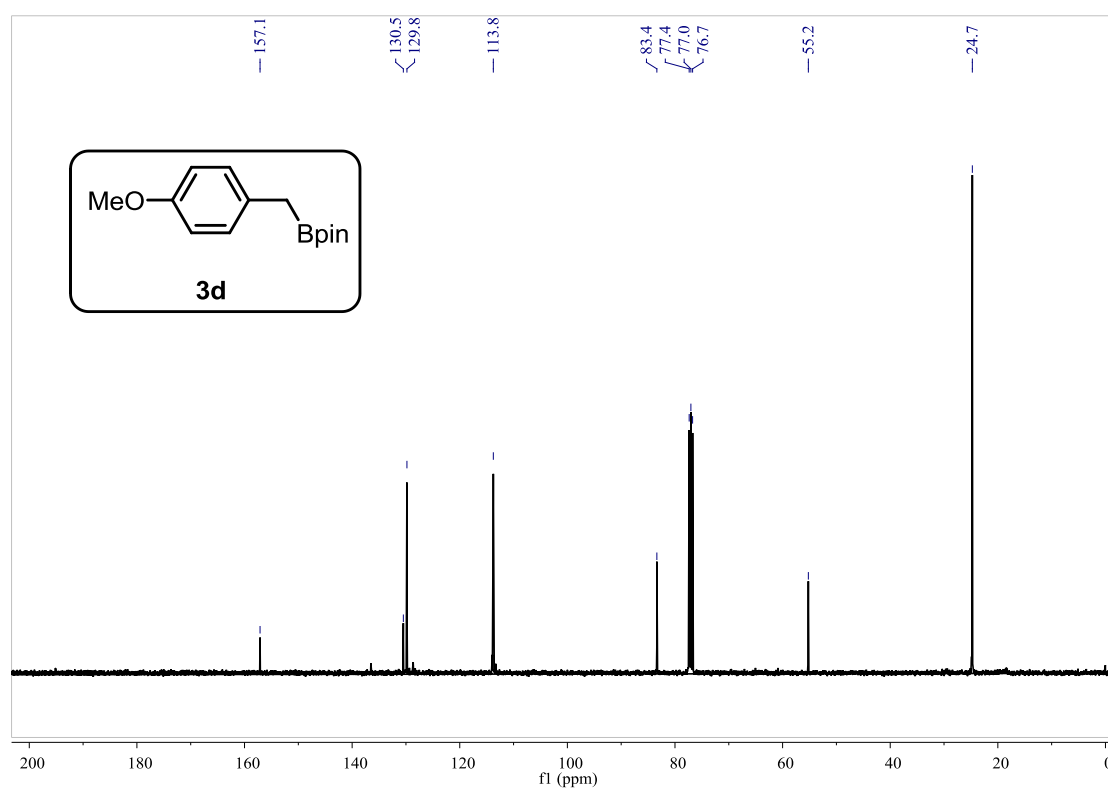

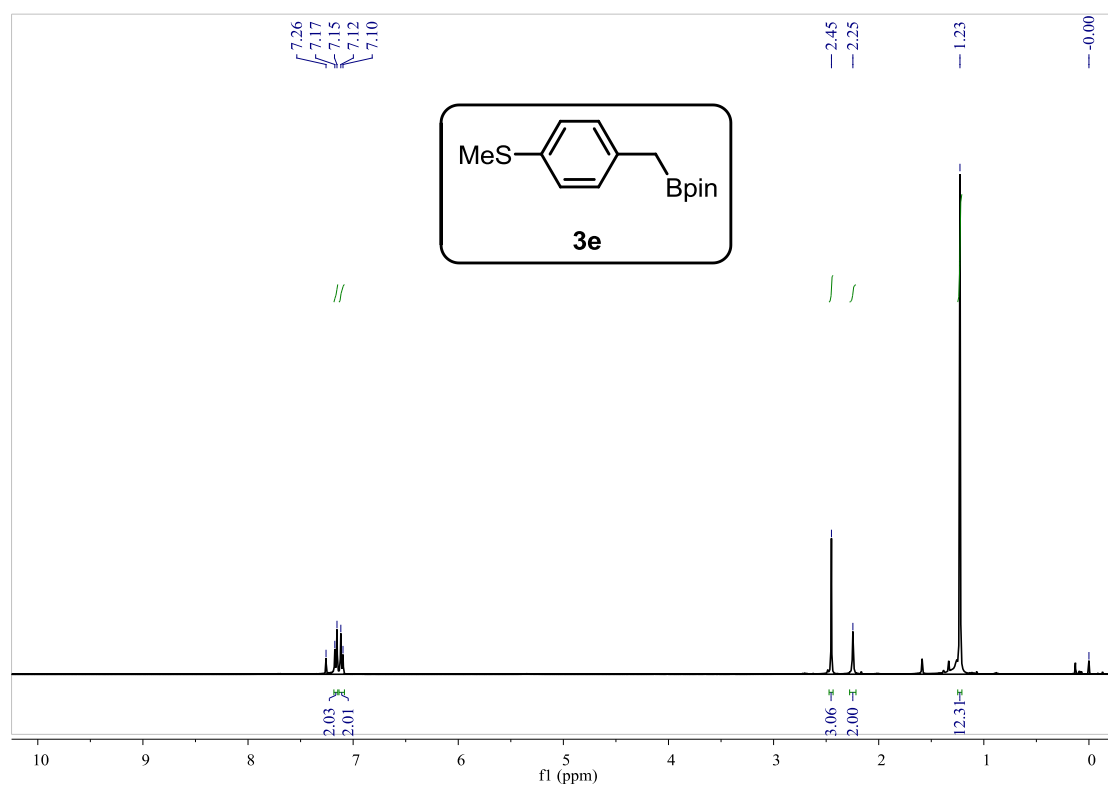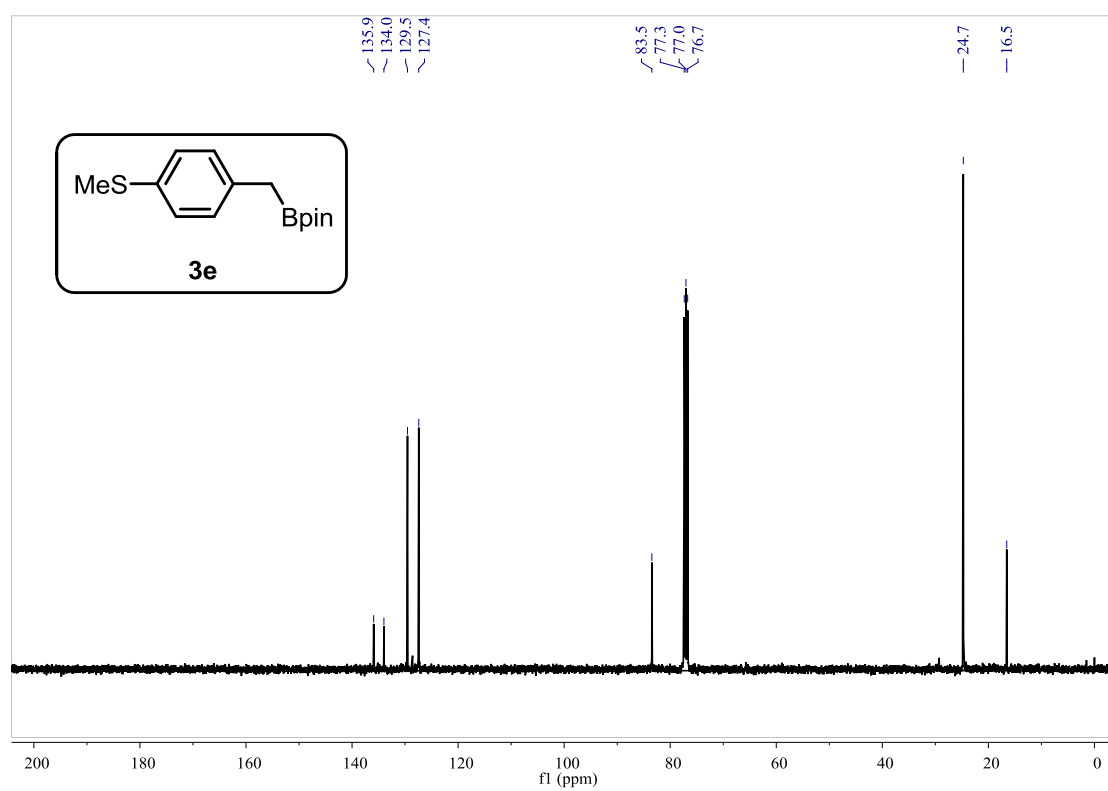

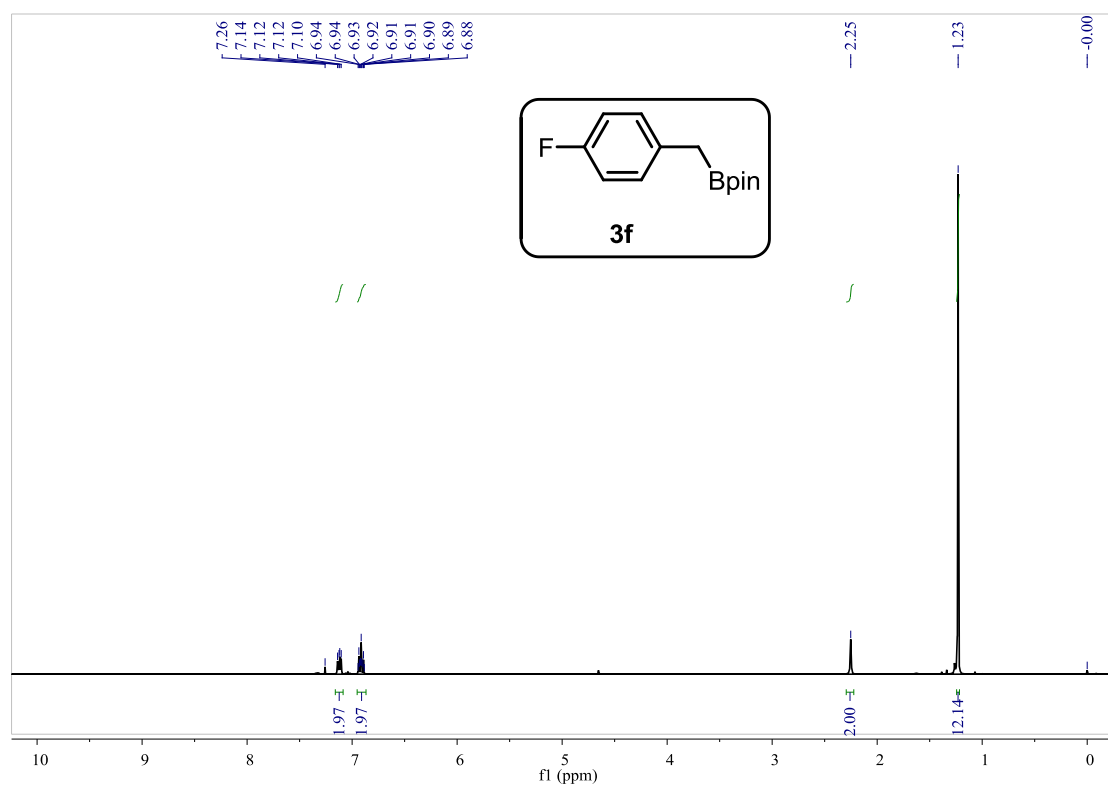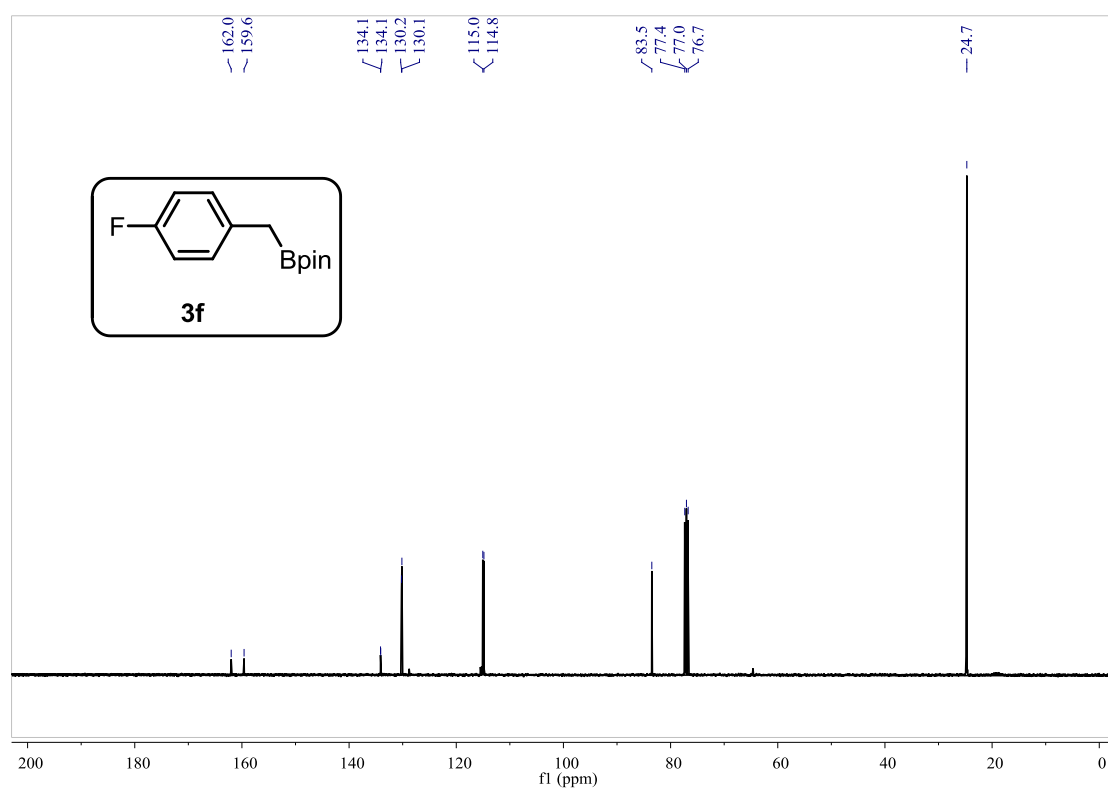

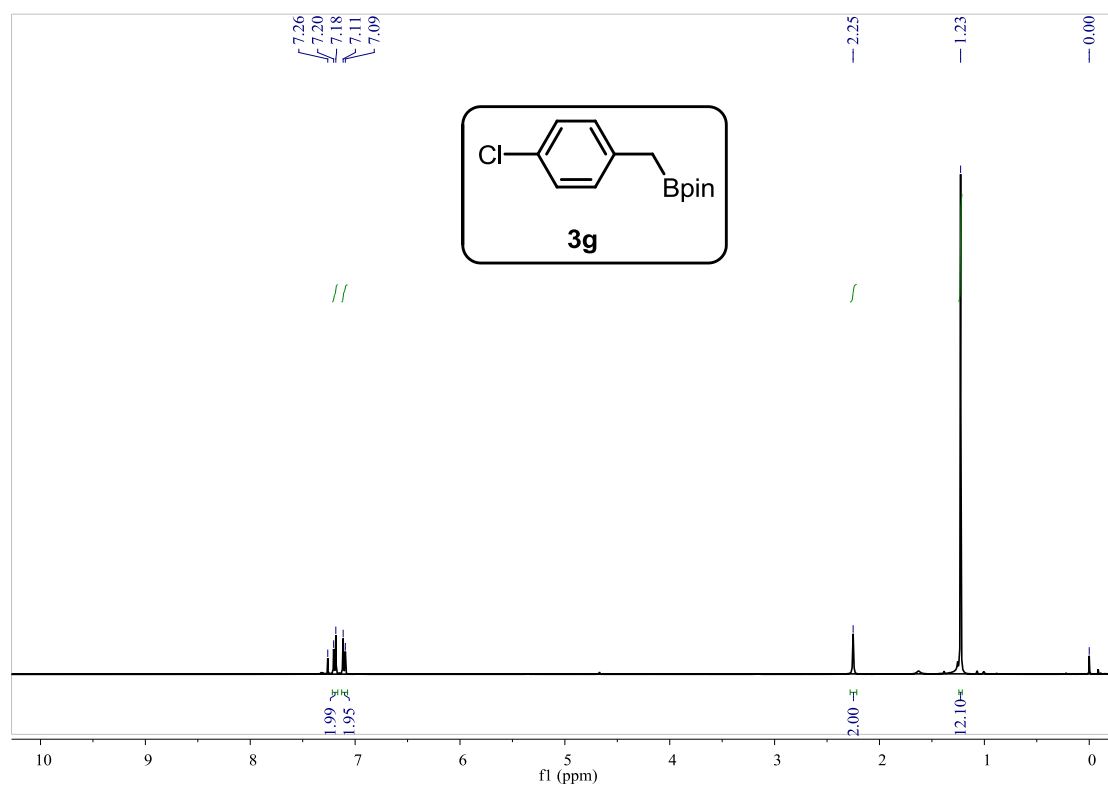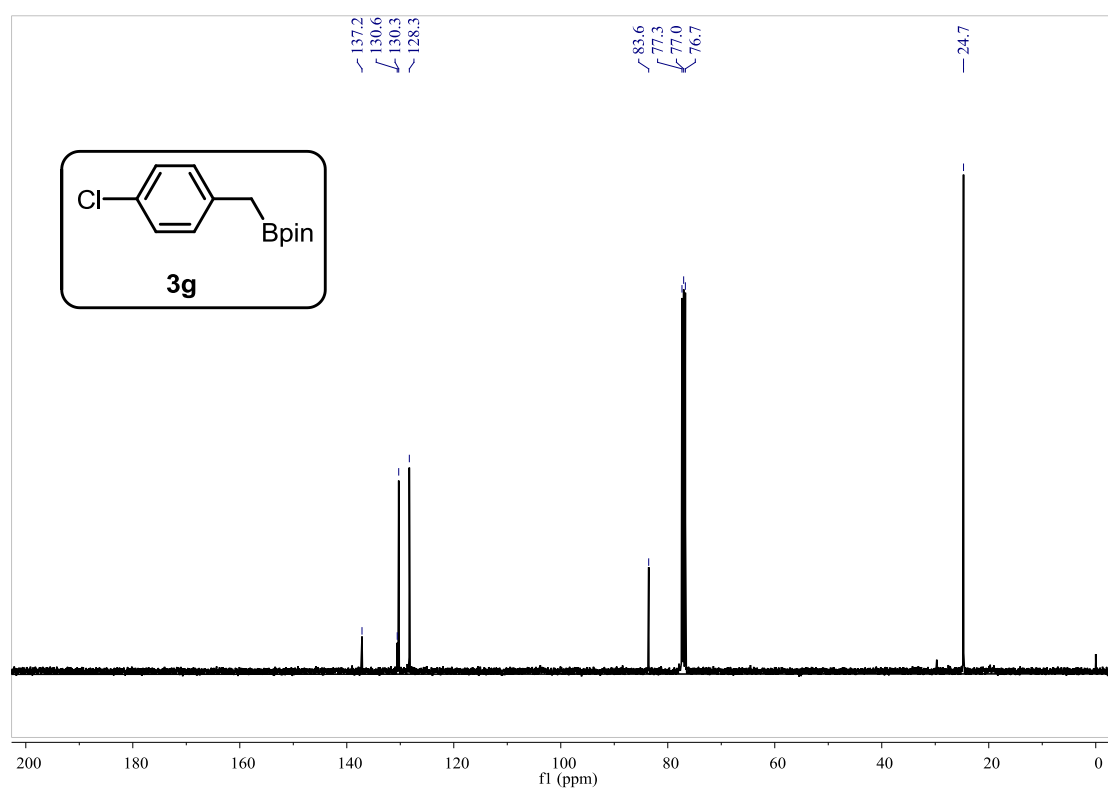



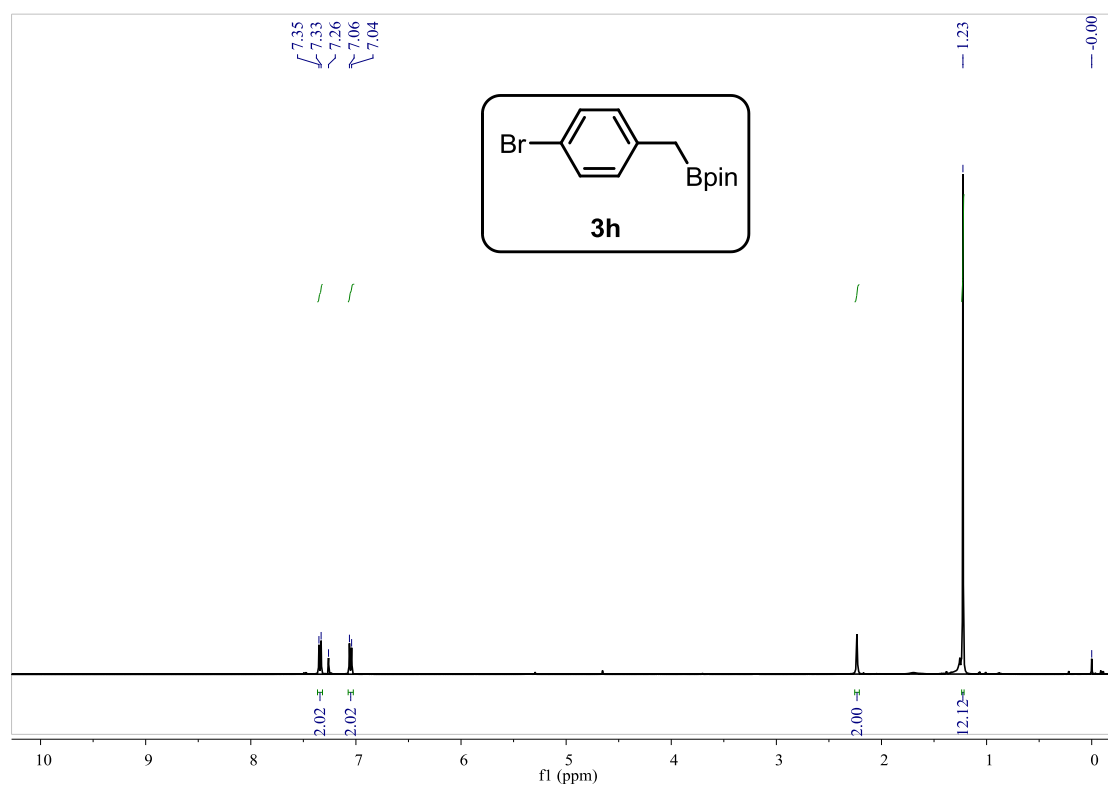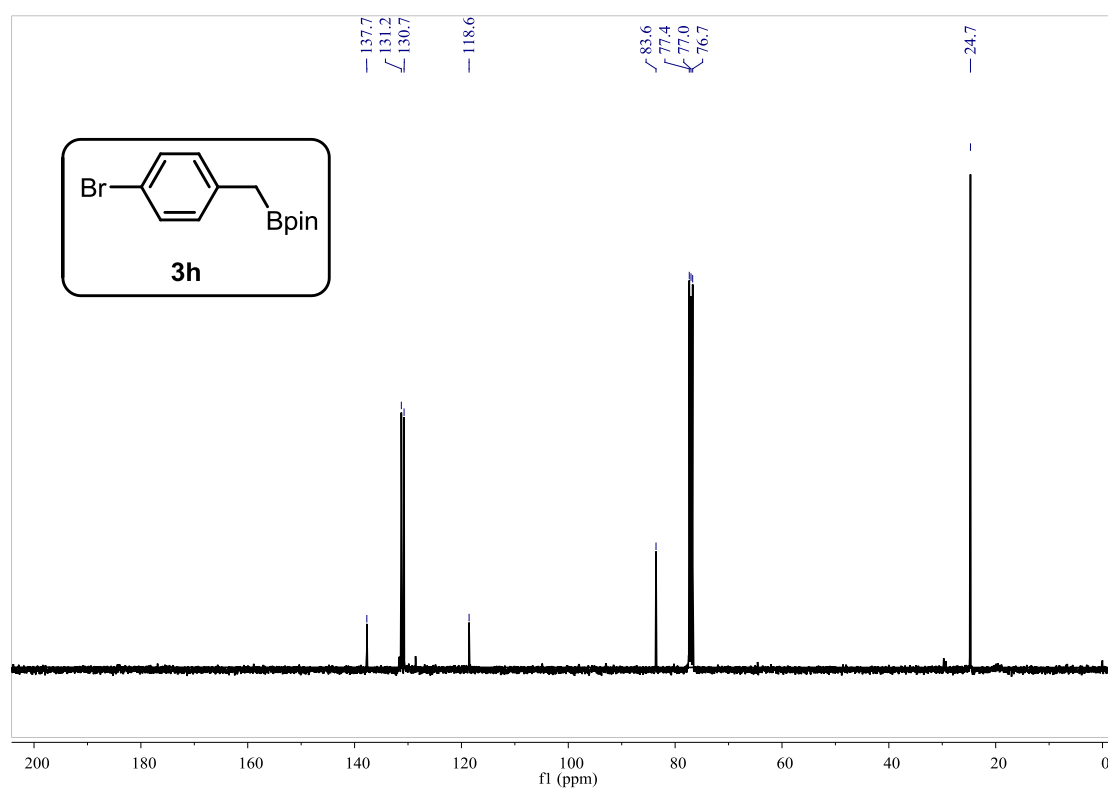

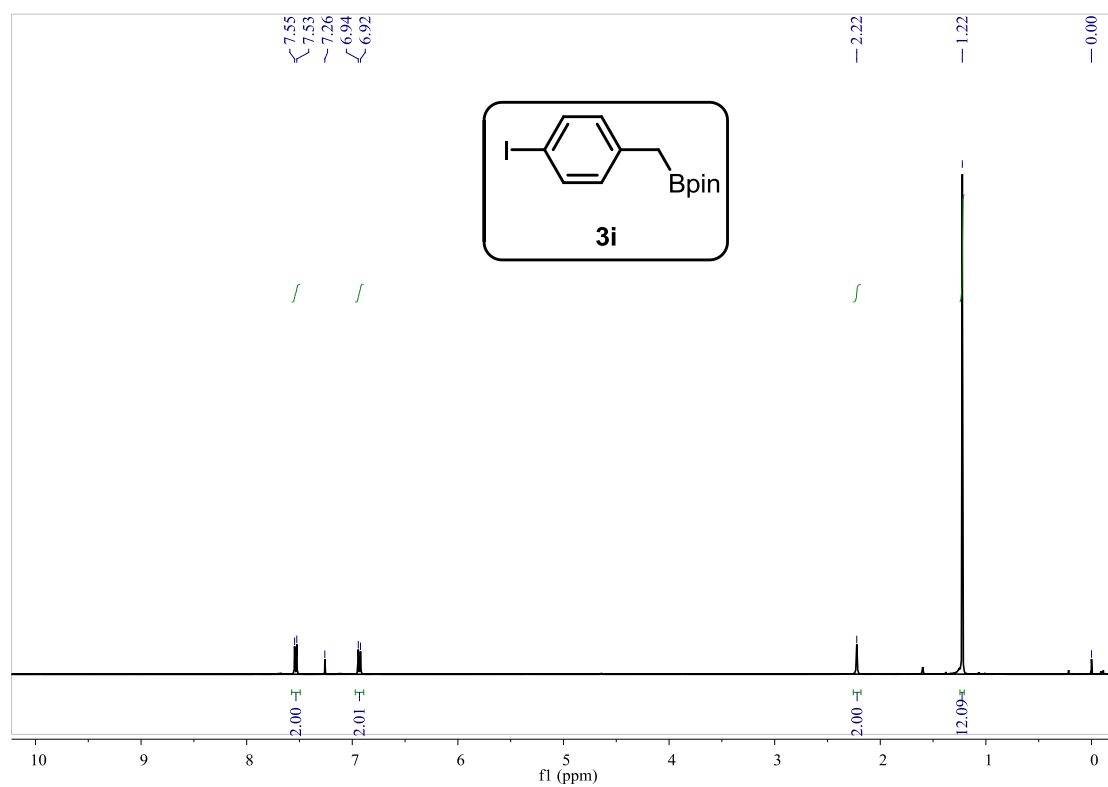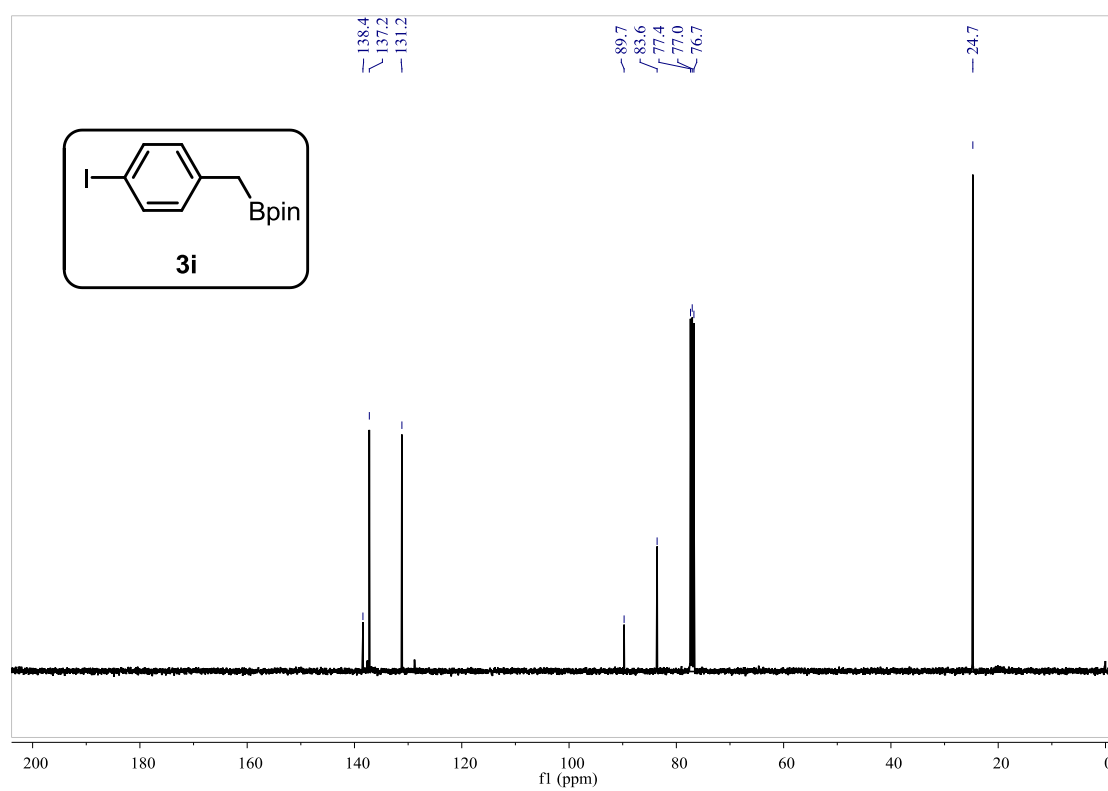

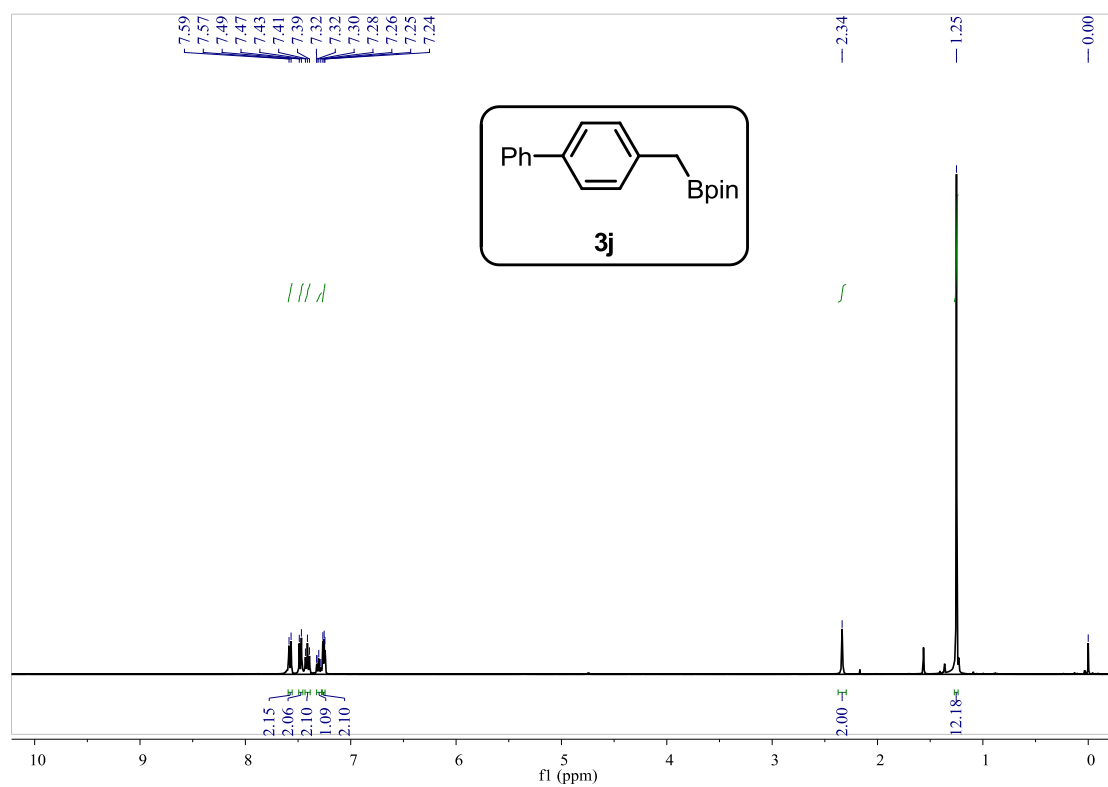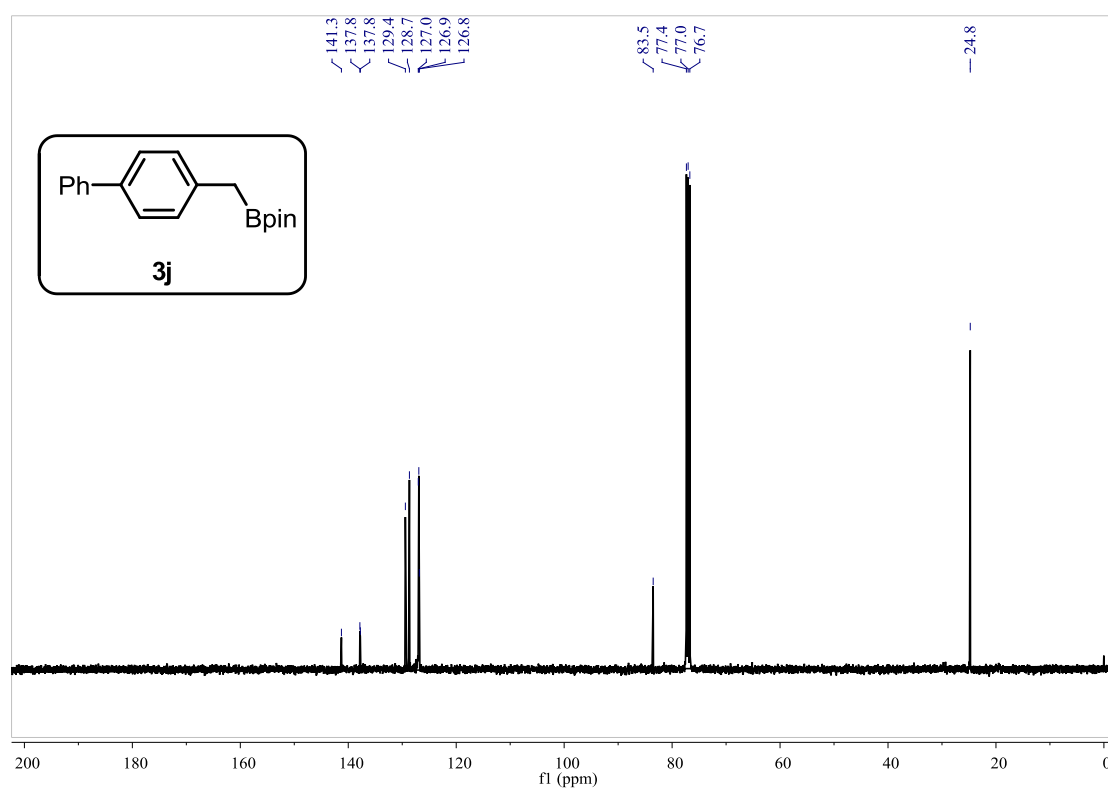

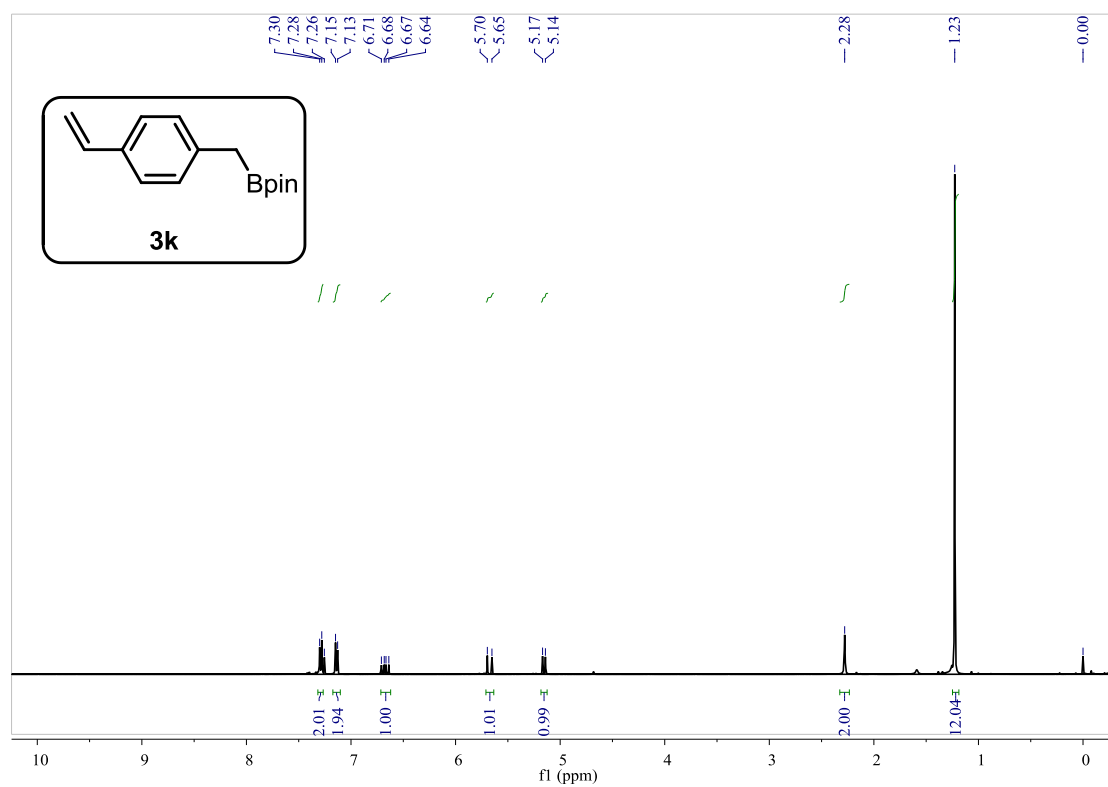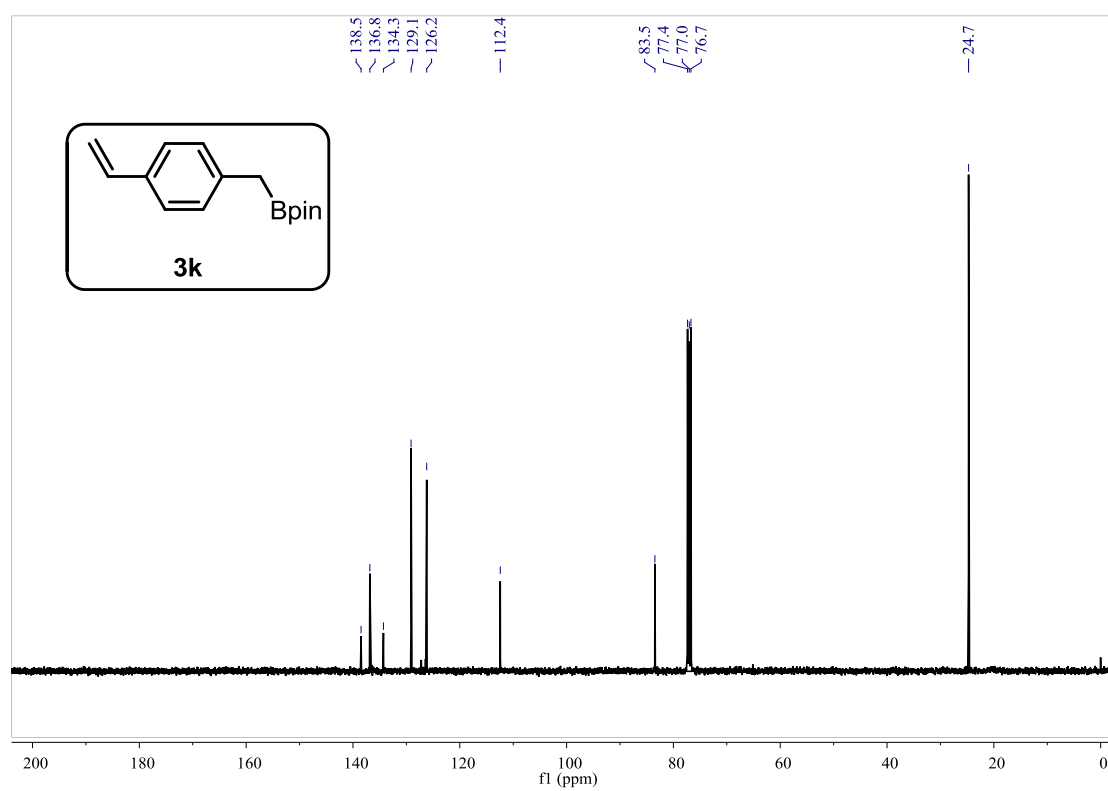

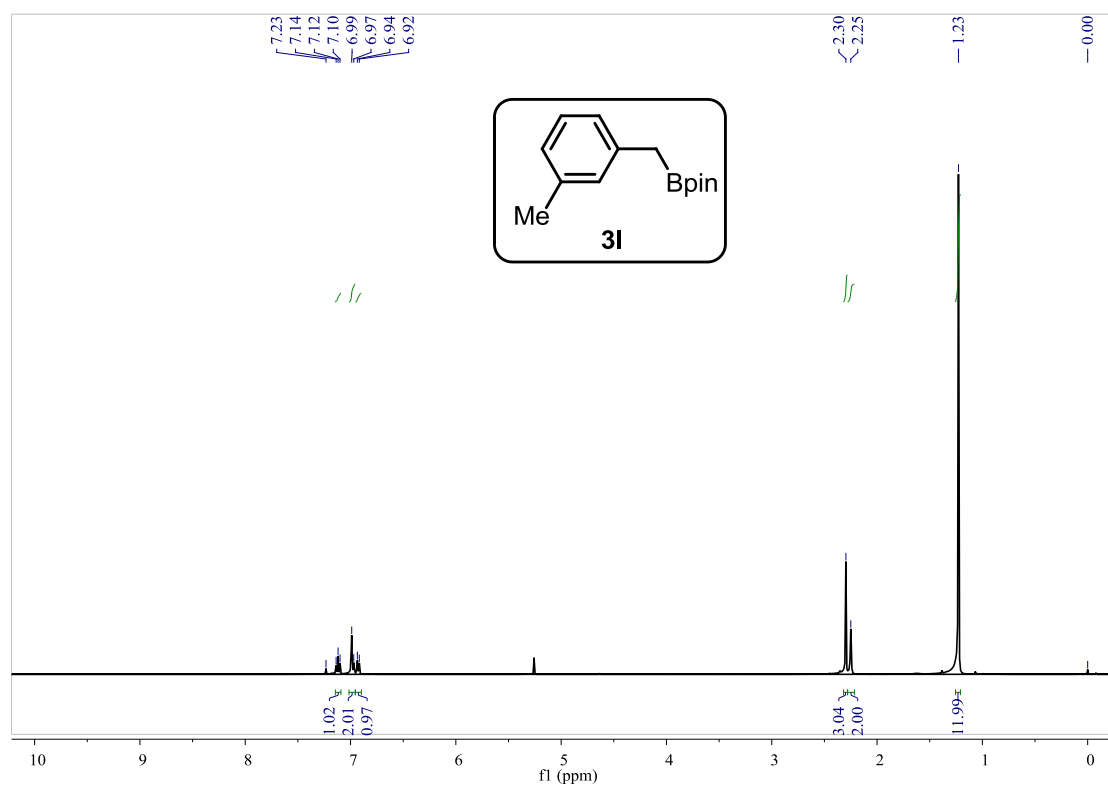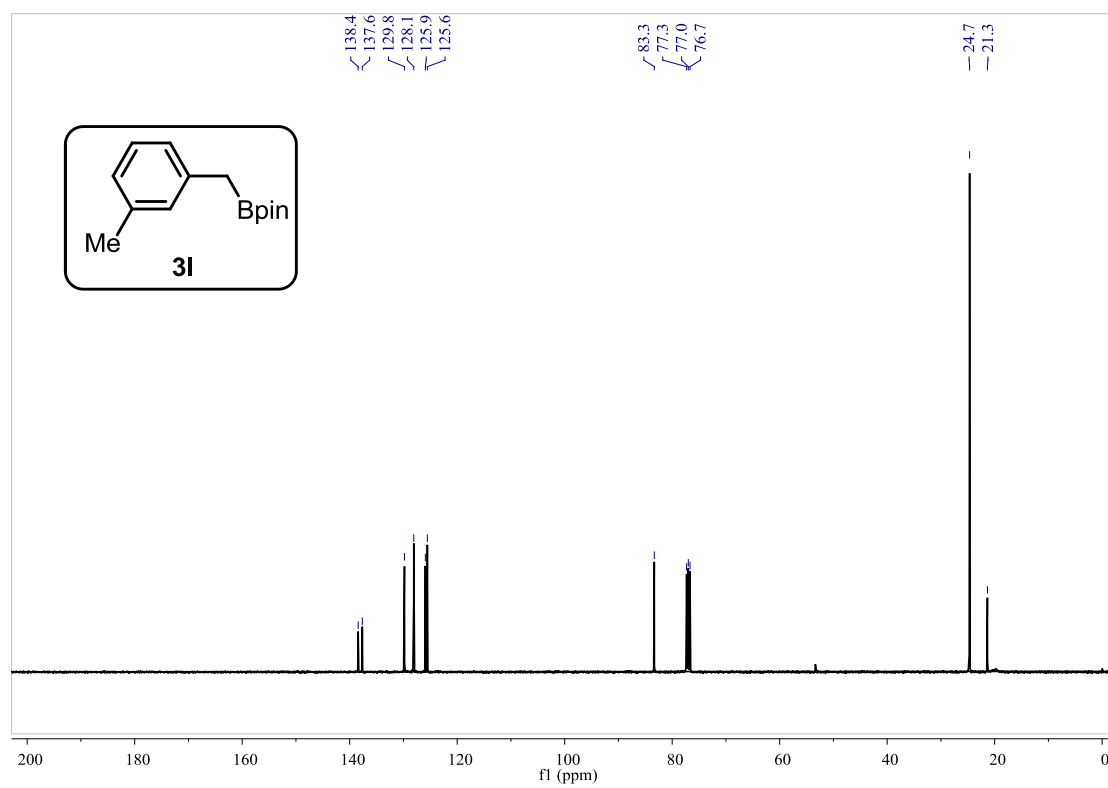

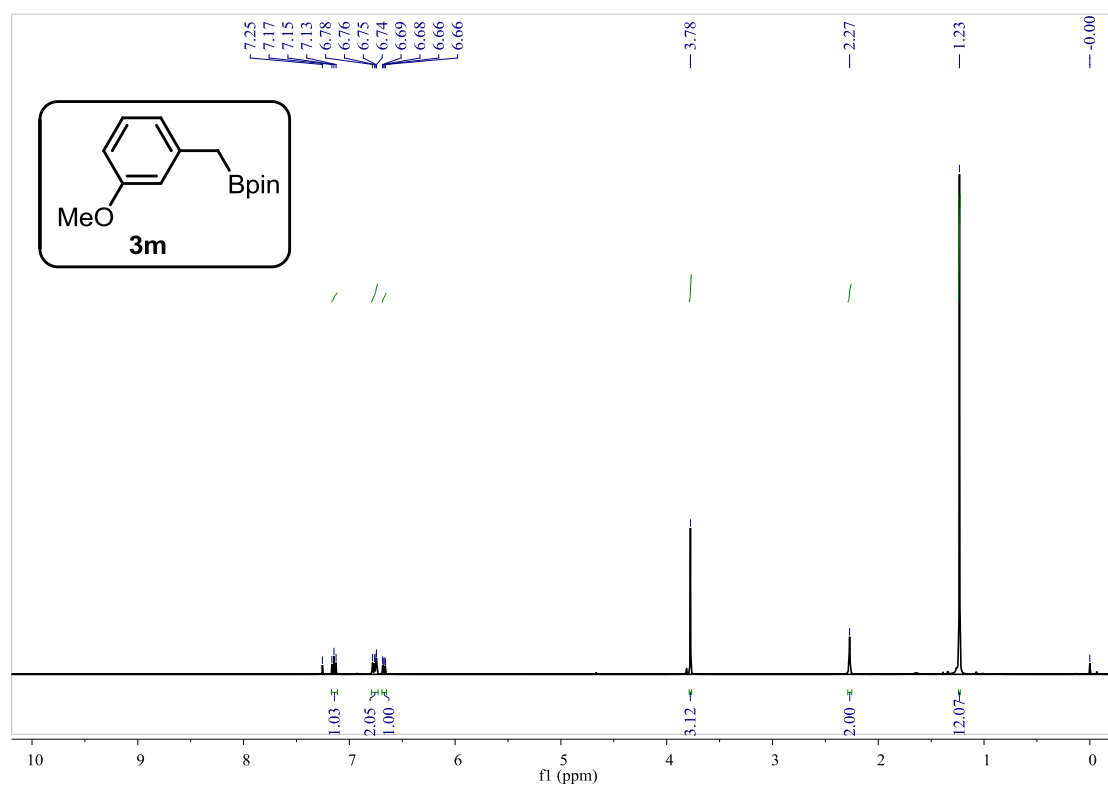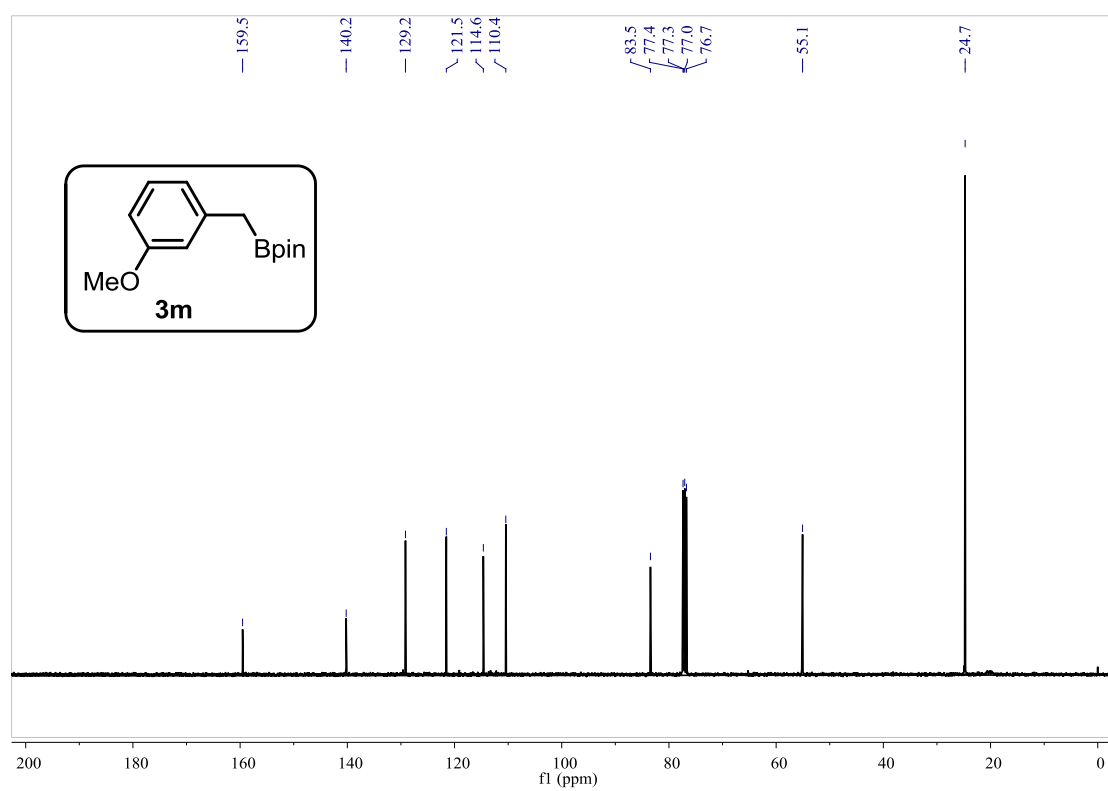

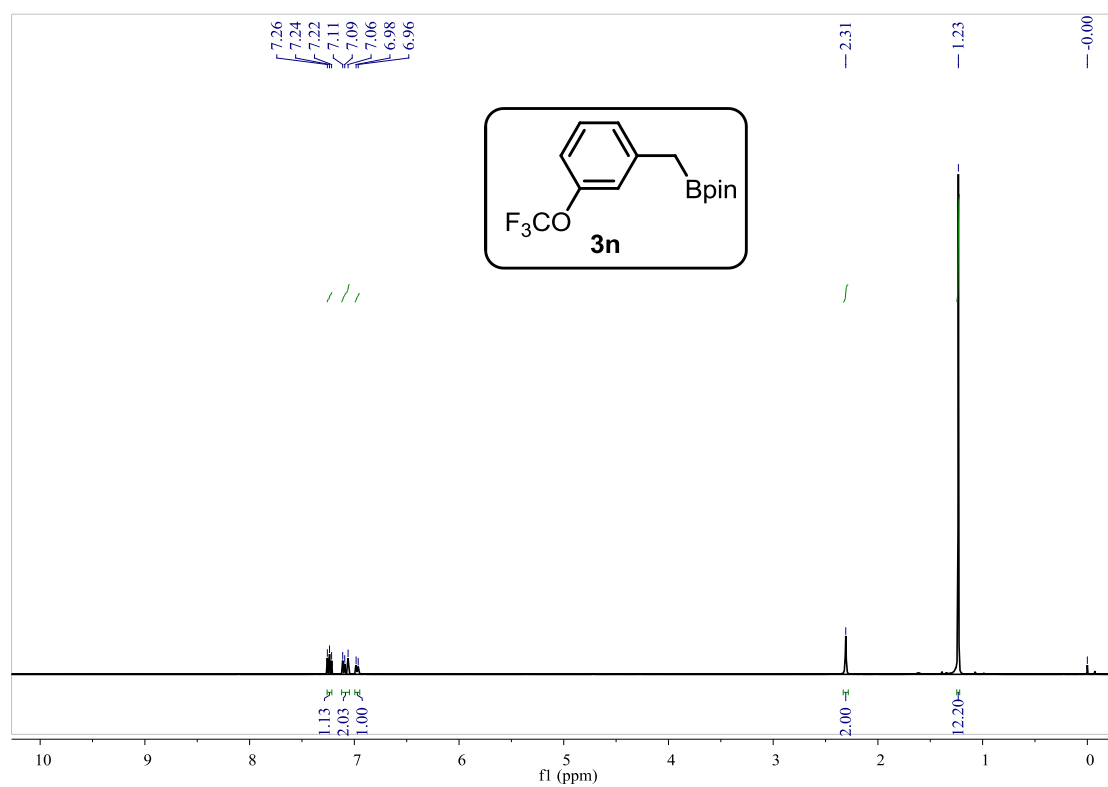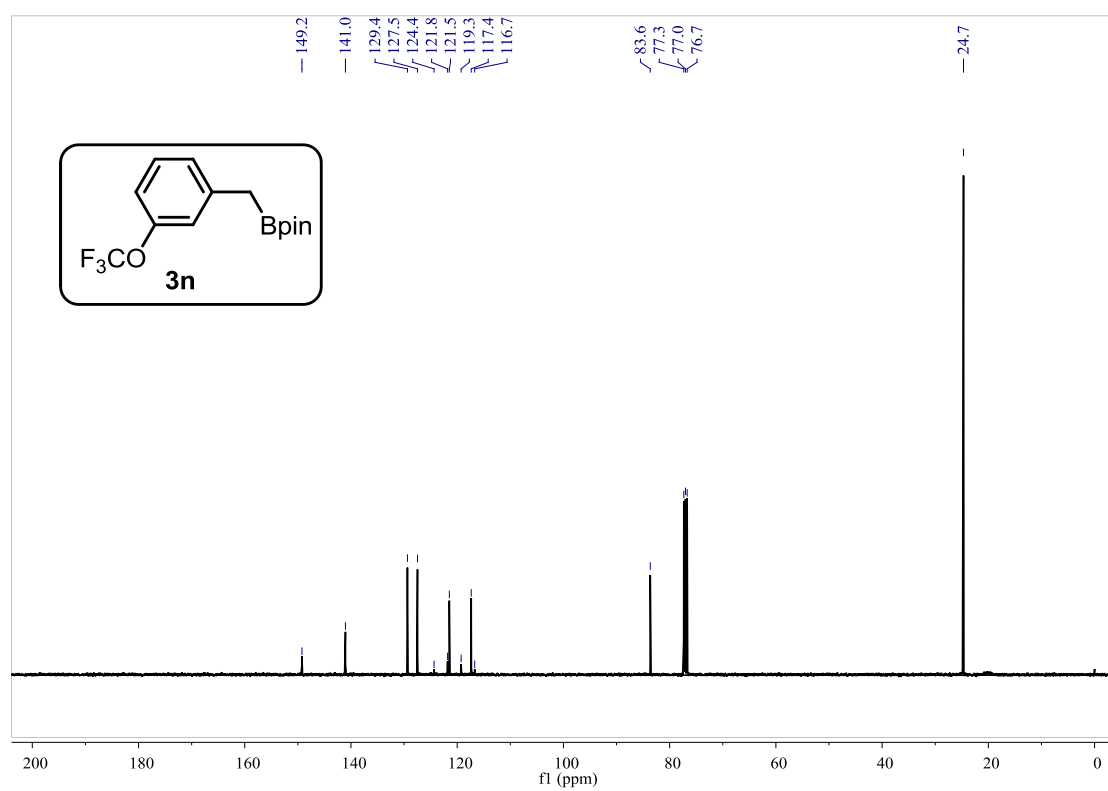

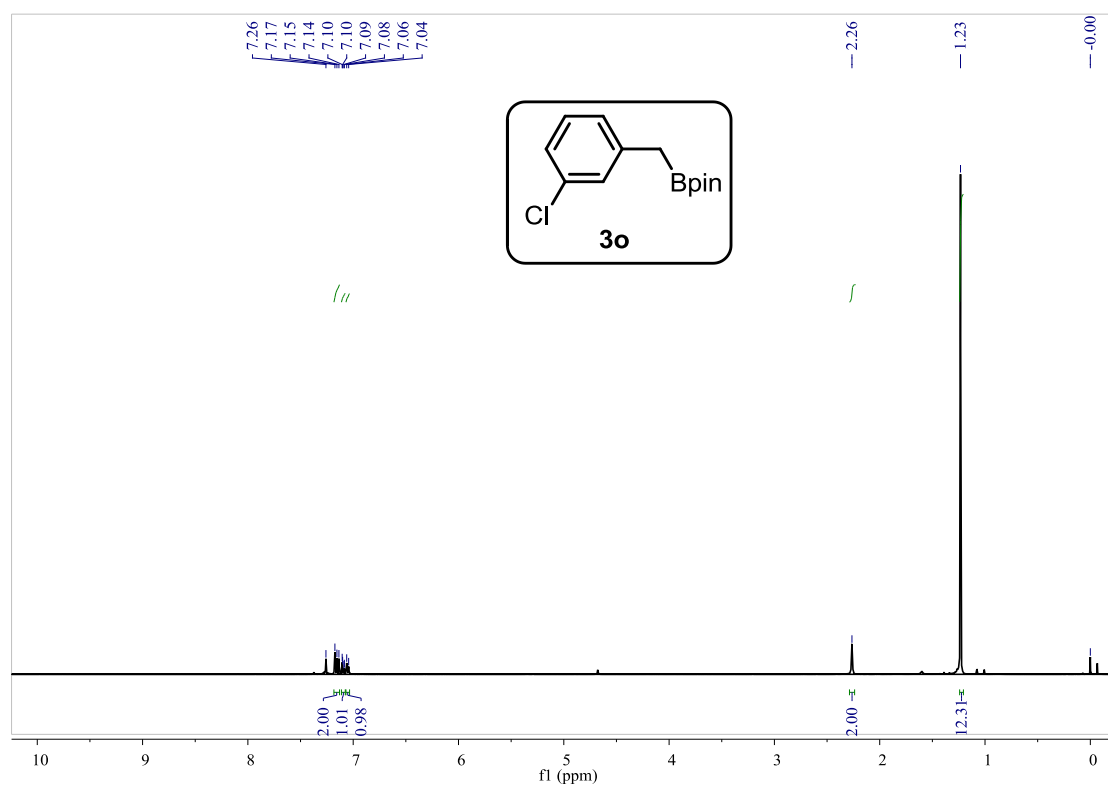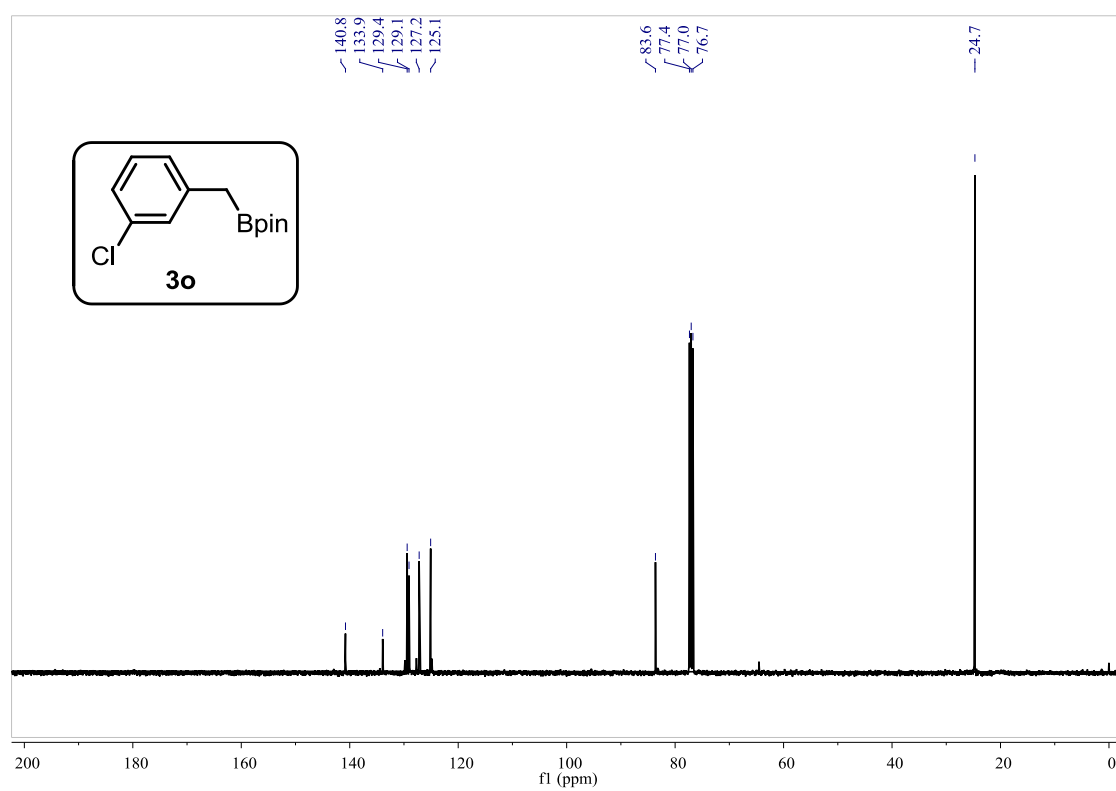



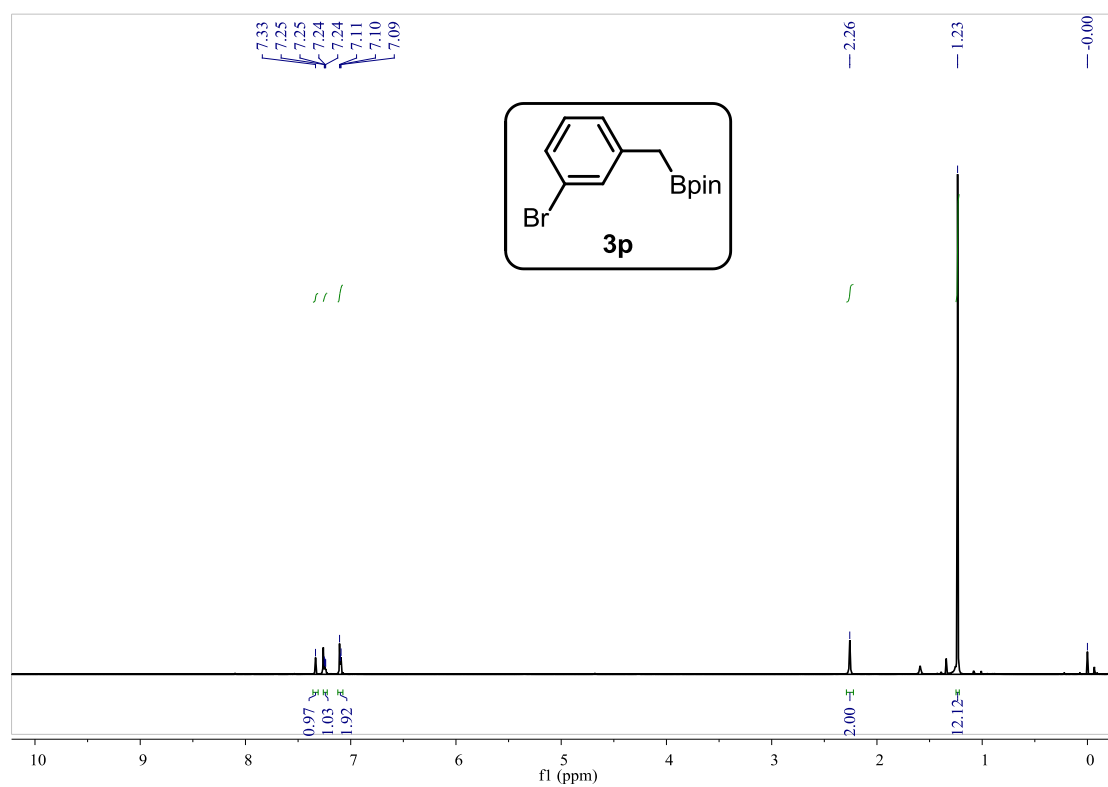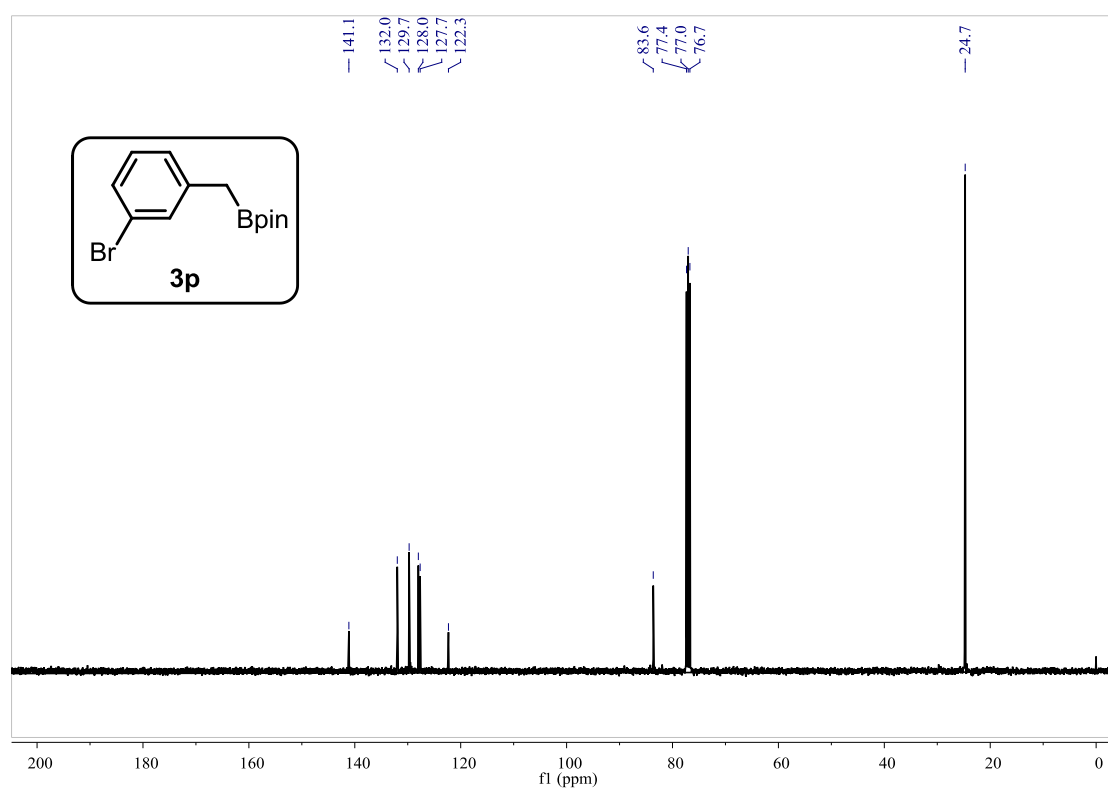

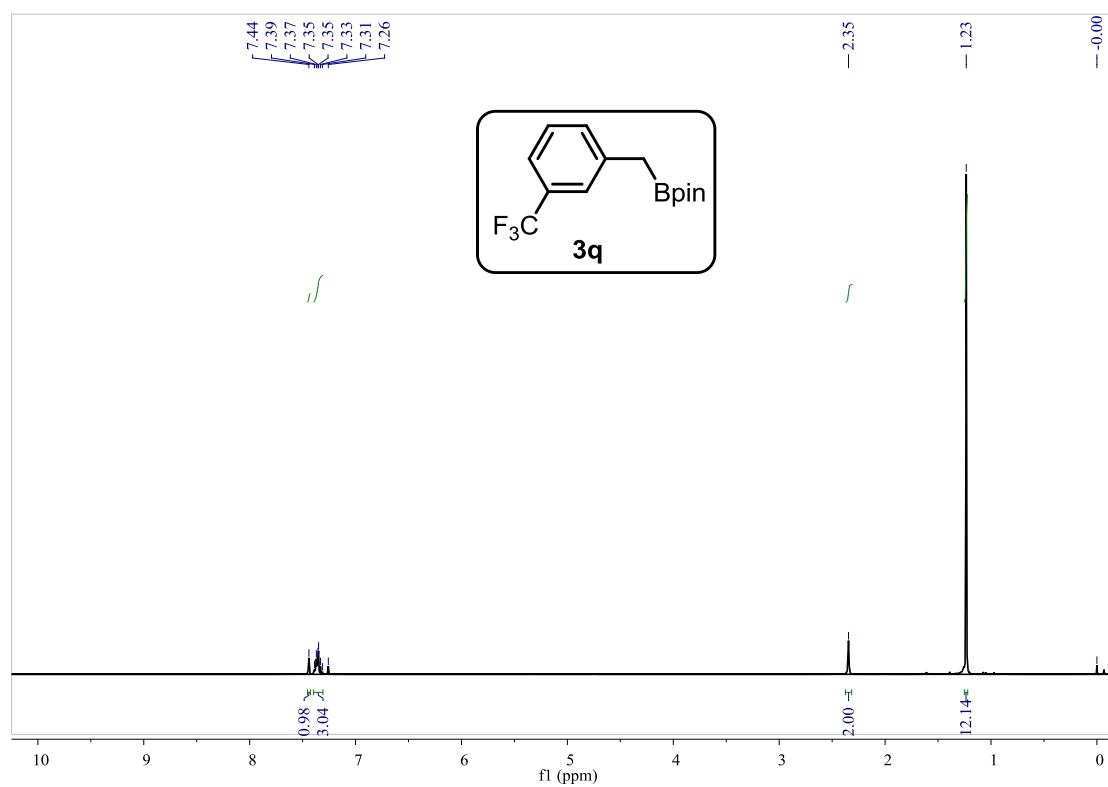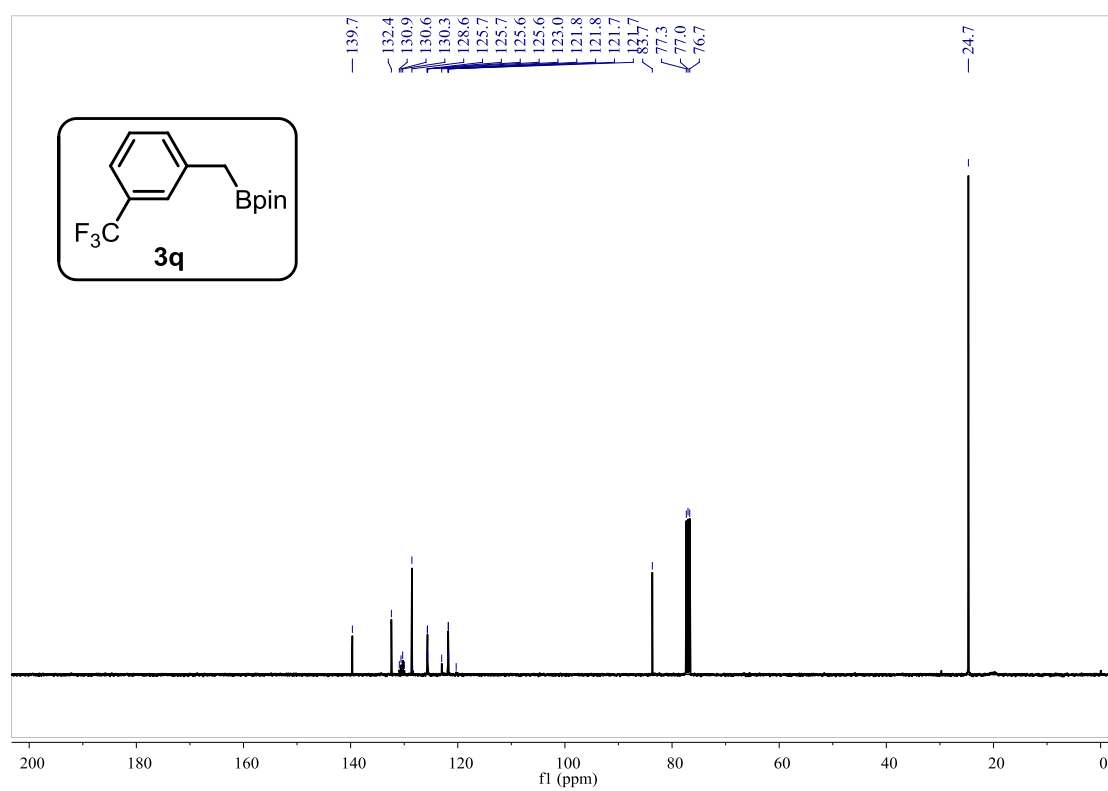

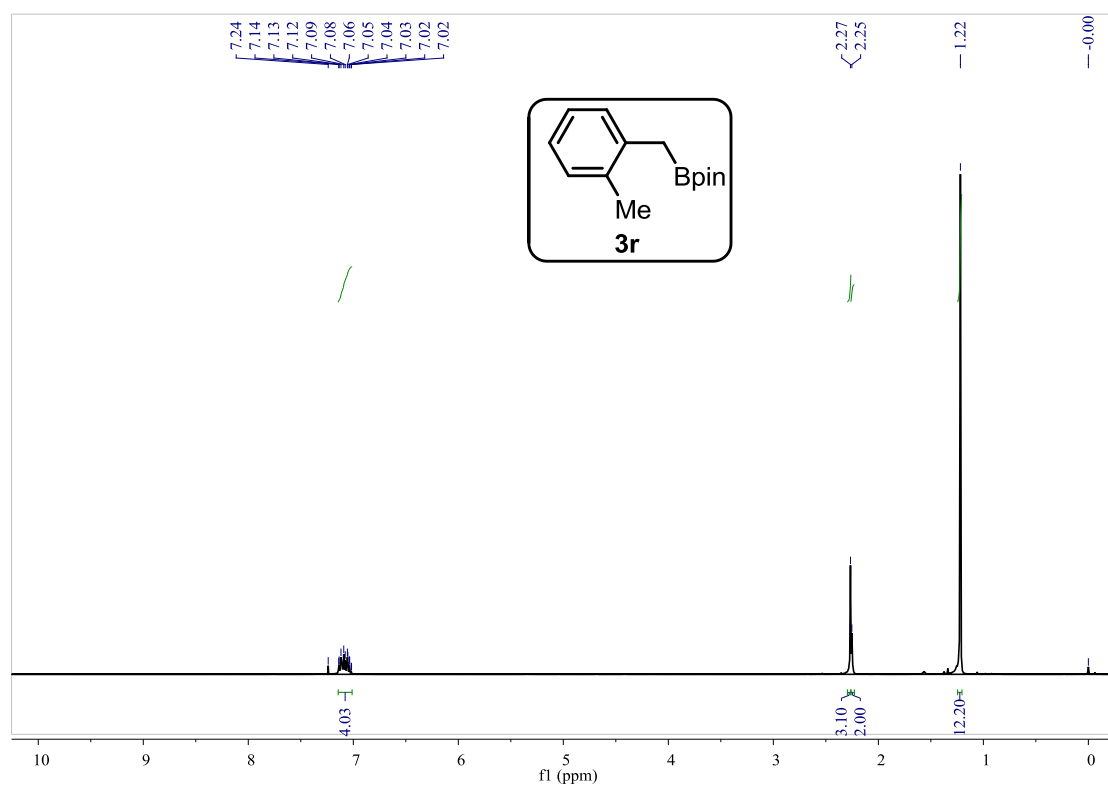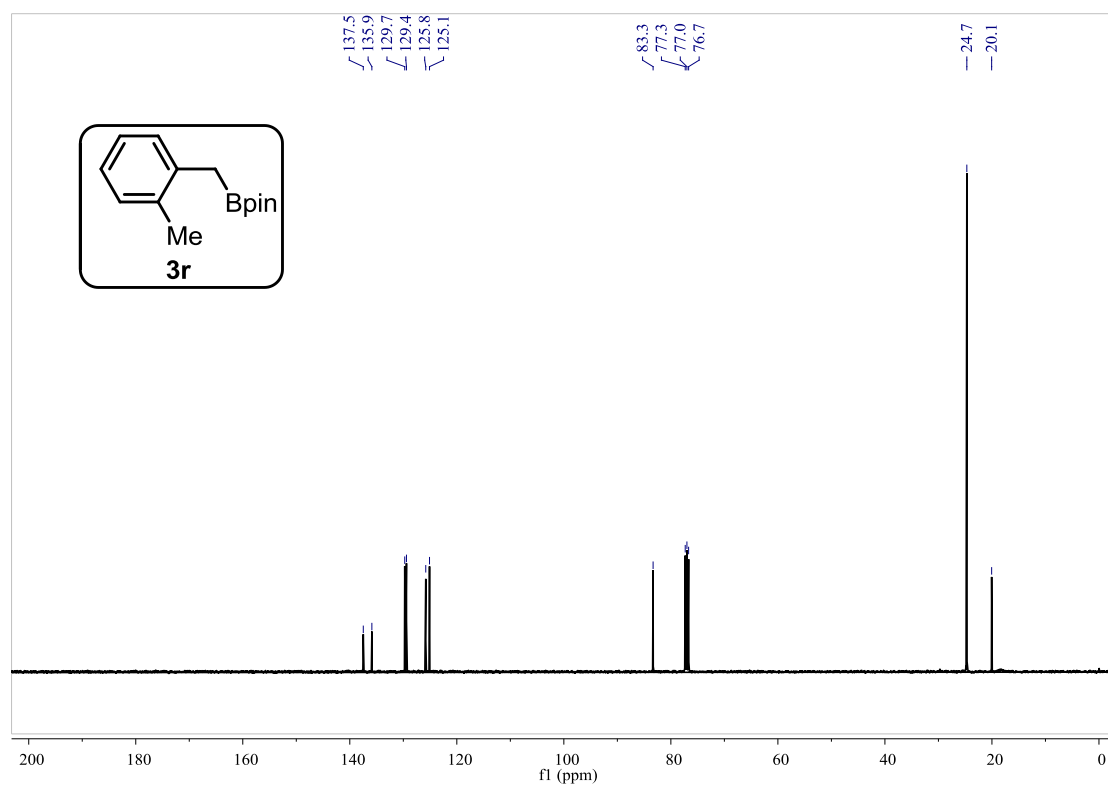

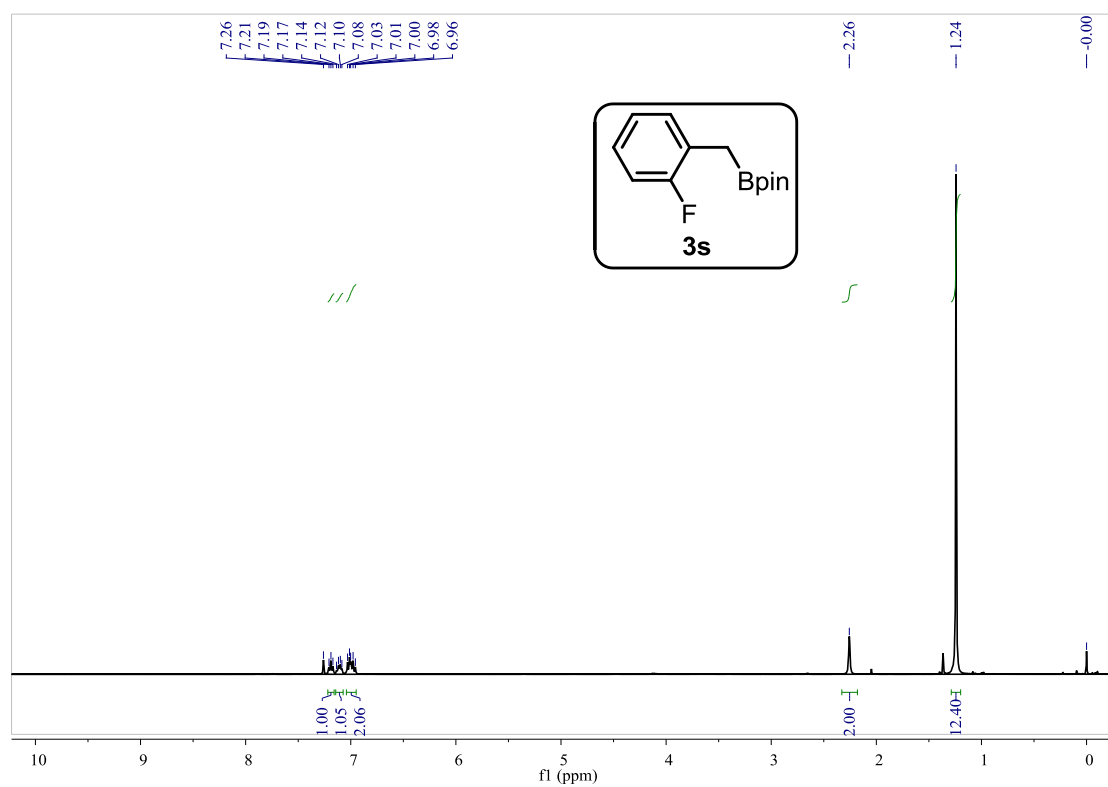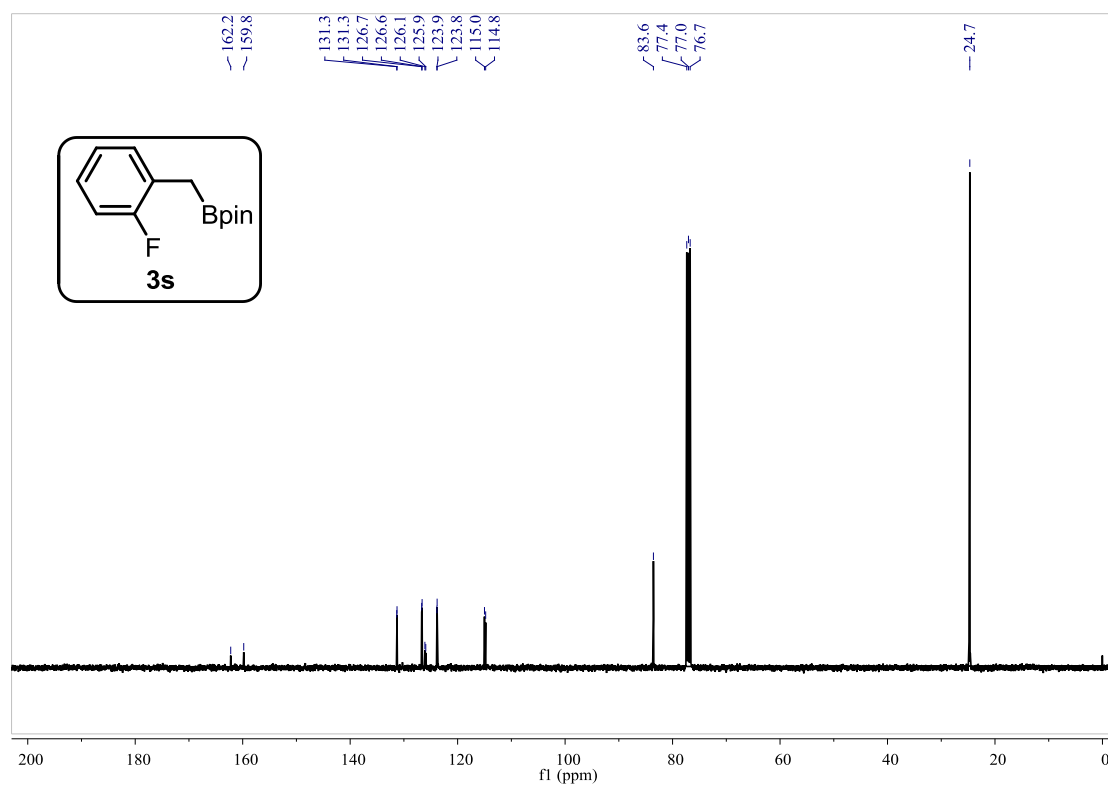

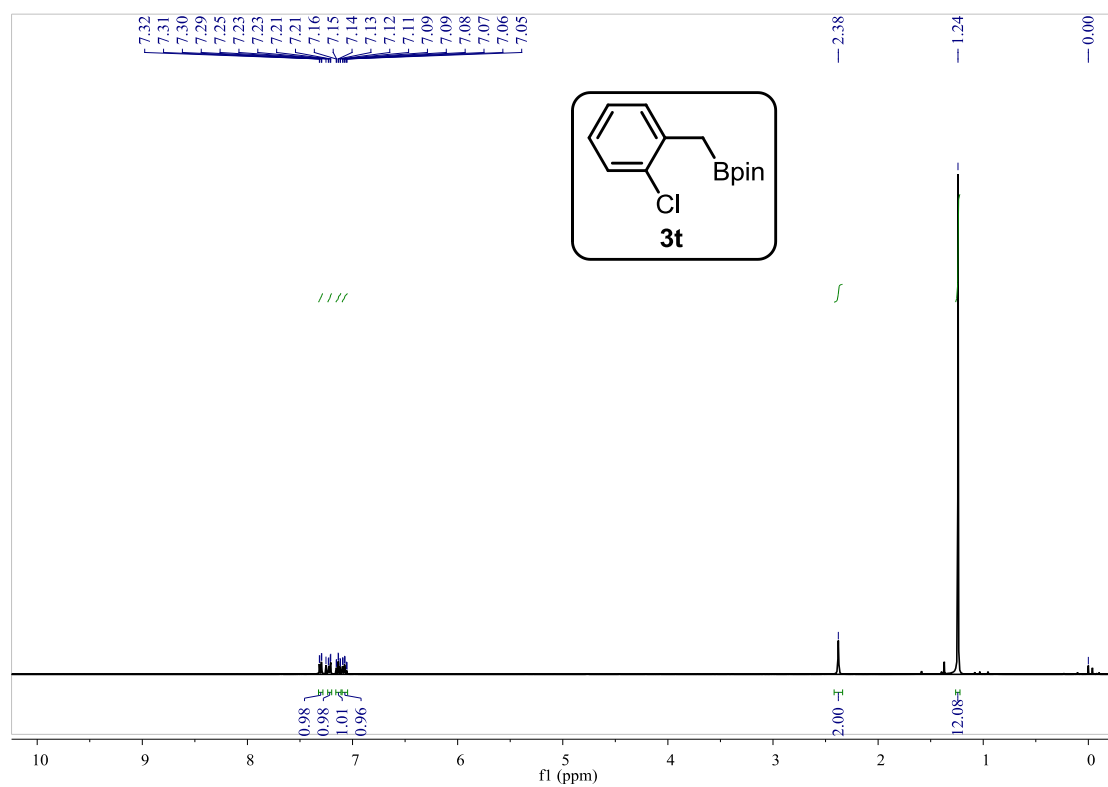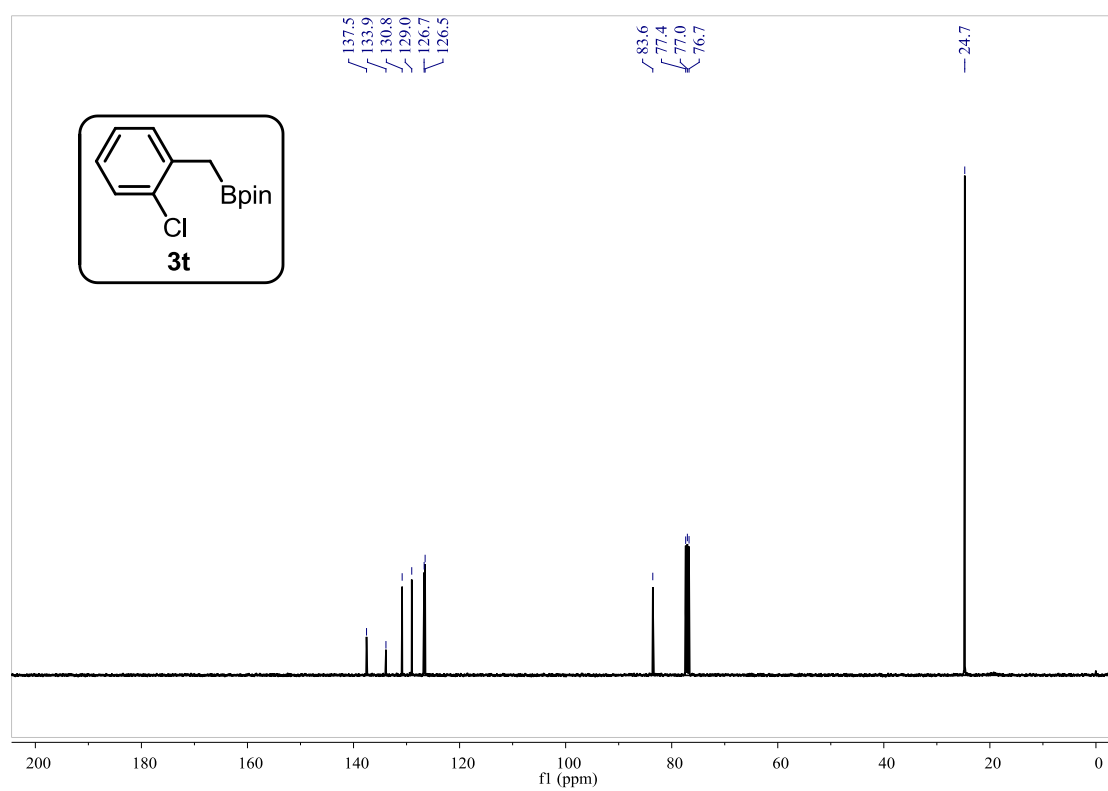

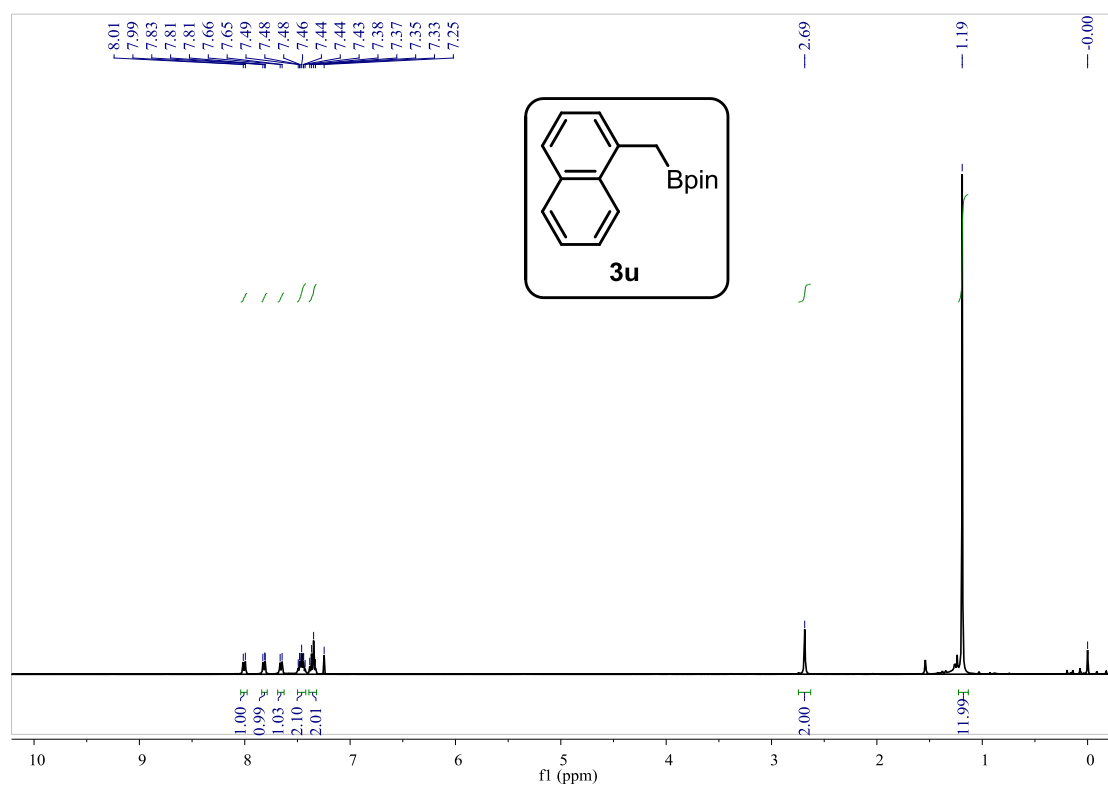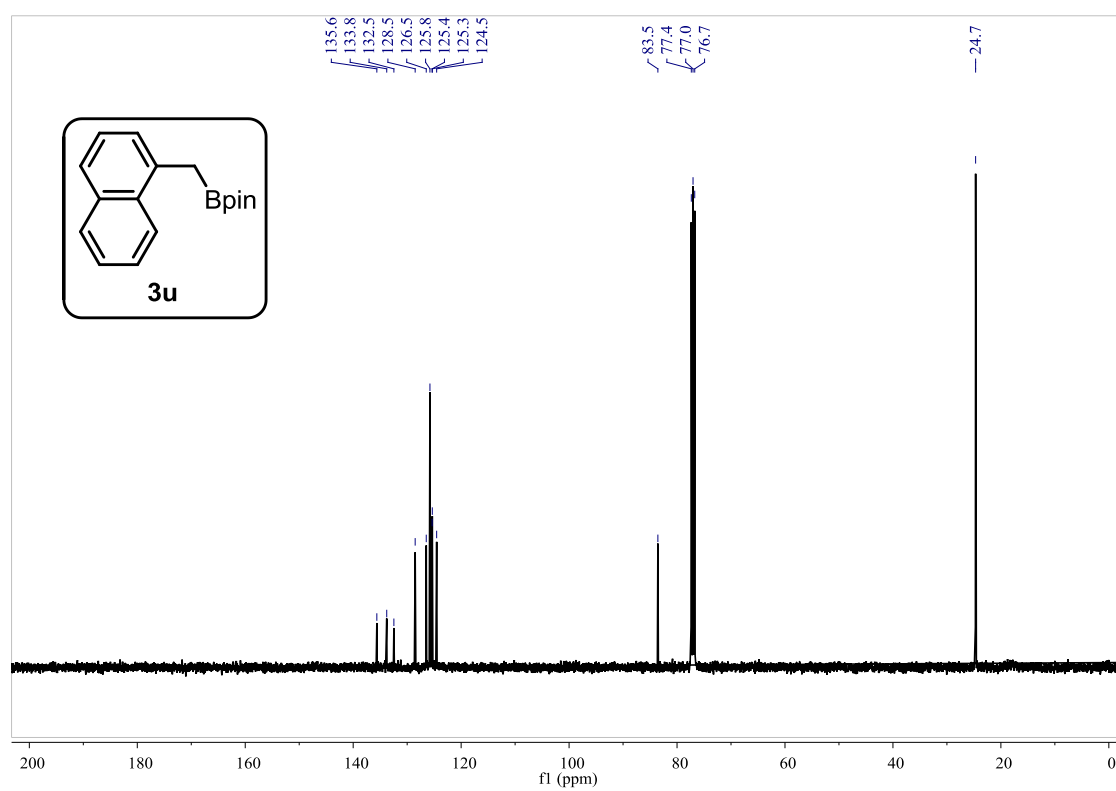

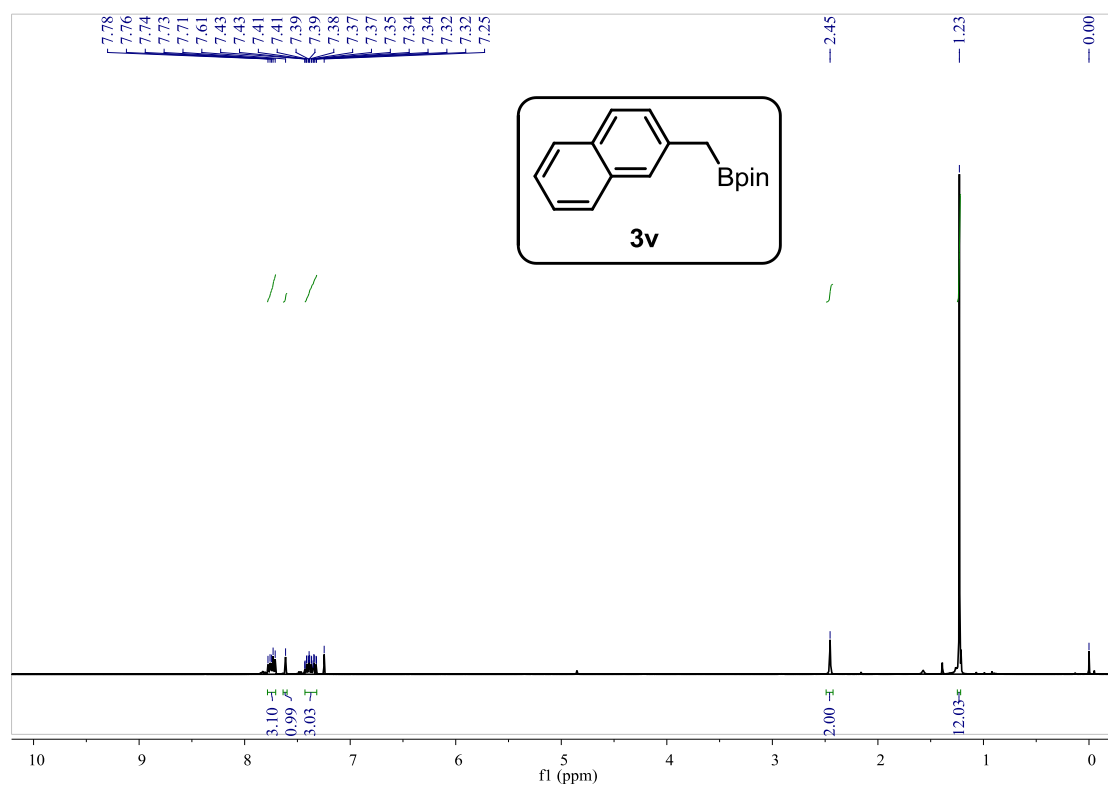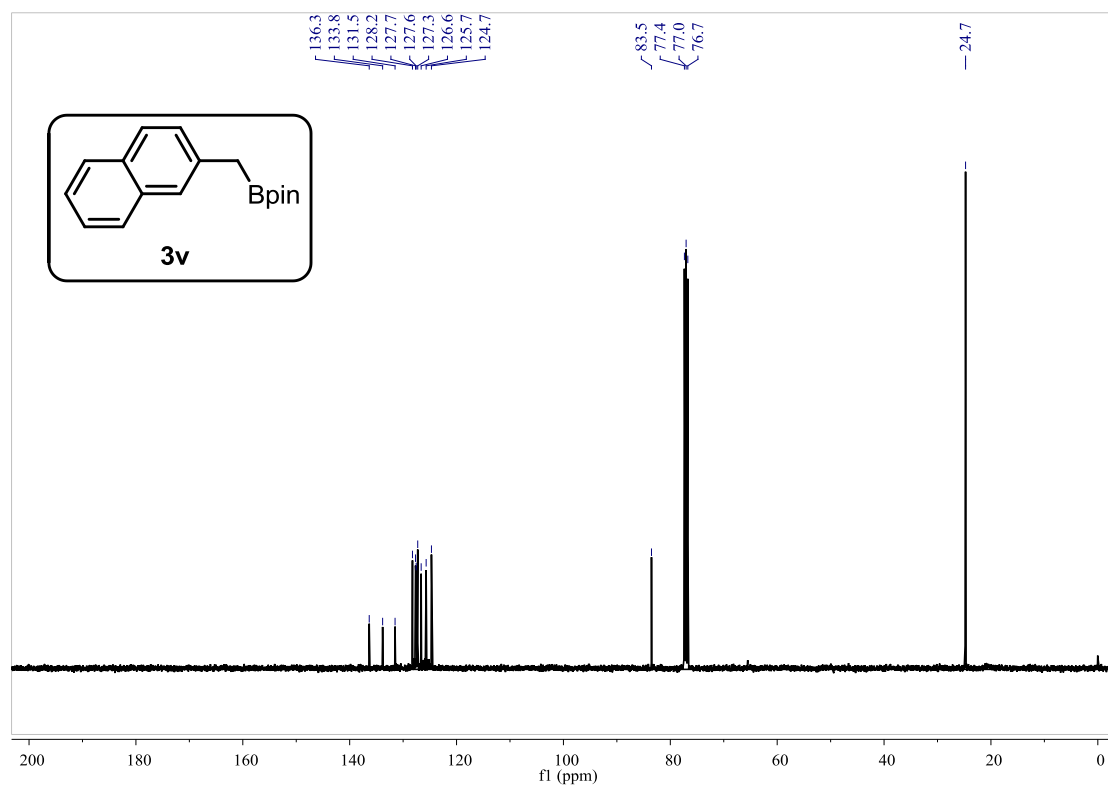

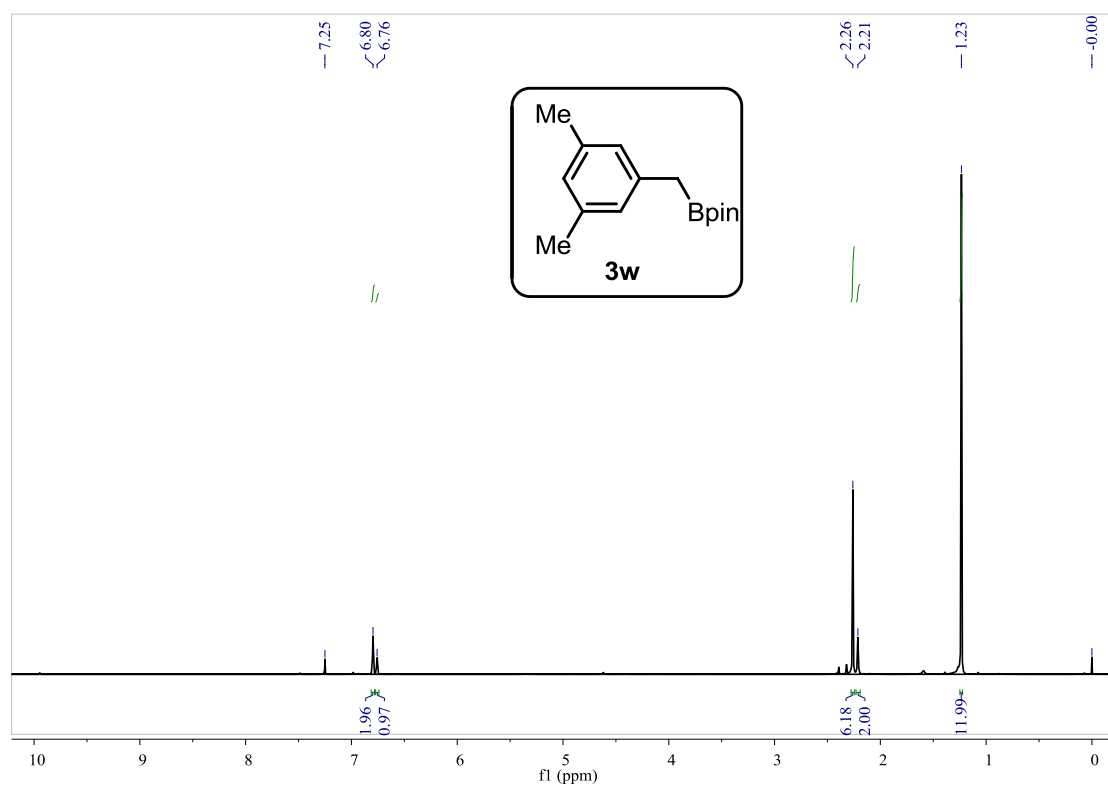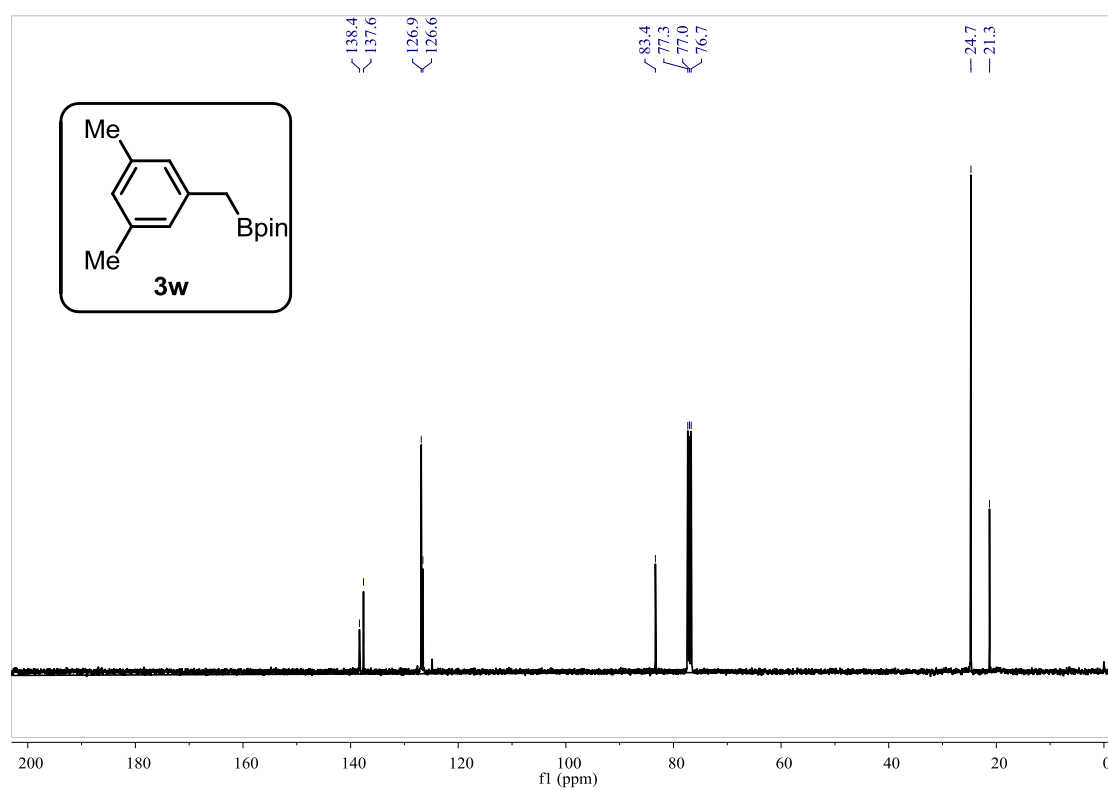



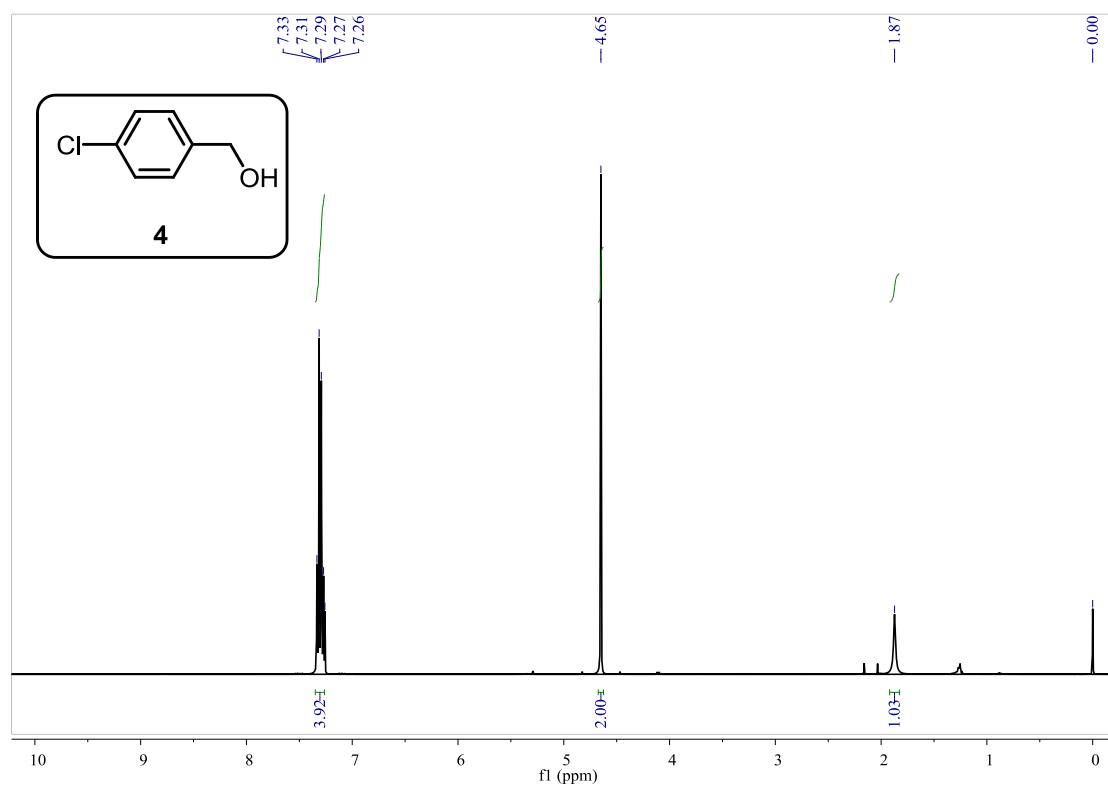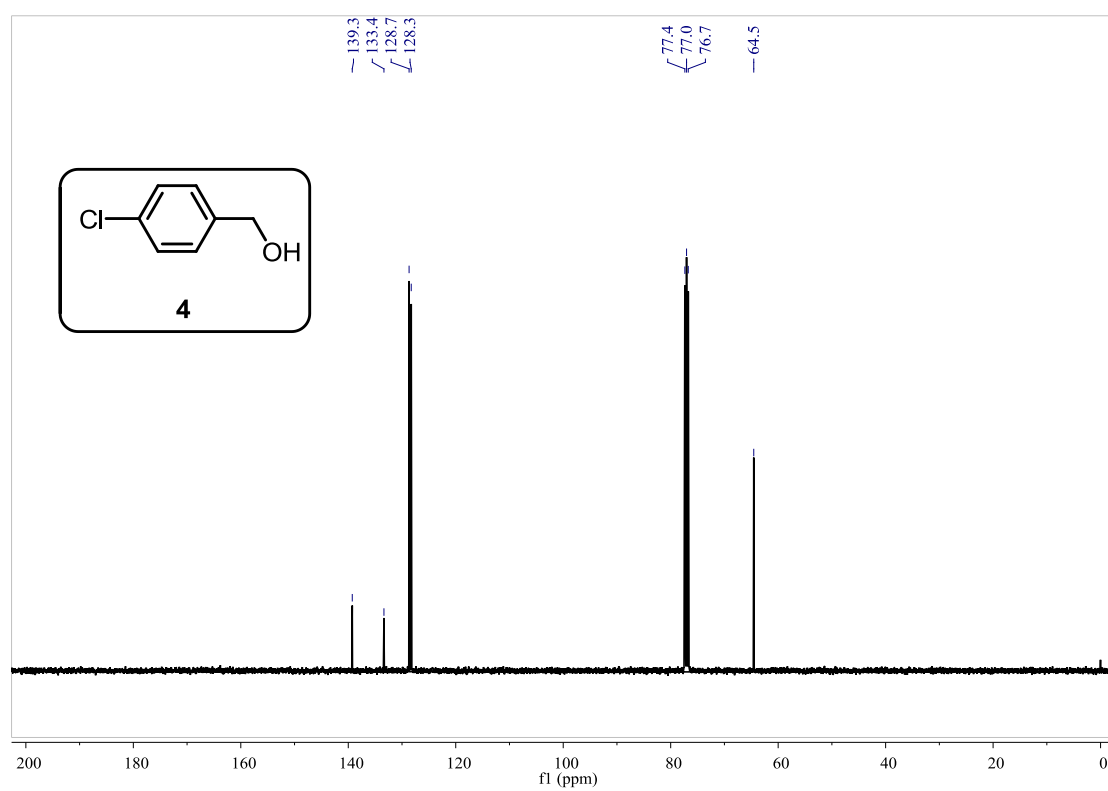

Supplement: c6qo00141f1.pdf [file c6qo00141f1.pdf]
